# Supplementary material for: The Emirati T2T-Level Pangenome: A Graph of 58 Complete Genomes
Source: bioRxiv preprint, doi:10.1101/2024.12.16.628631, version 2 (2025-10-02)
Supplement: Supplementary Tables [file 628631_file04.xlsx]

## Sheet: Table Key
Table	Description	Caption
Table 1	T2T Illumina N50 sequencing stats	Supplementary Table 1: Summary of Illumina short-read sequencing data generated using the NovaSeq 6000 platform. Sequencing was performed with a read length of 150 bp, yielding coverage exceeding 90X for all individuals. Coverage was calculated based on the CHM13 genome length.
Table 2	T2T Long read runs N50 sequencing stats	Supplementary Table 2: Summary of long-read sequencing data generated for ERG_FATHER, ERG_MOTHER, and T2T-ERG_XX using PacBio HiFi and Oxford Nanopore Technologies (ONT) platforms. Coverage is computed for the genome length of CHM13. ERG_FATHER has two HiFi and one ONT run, ERG_MOTHER has three HiFi and one ONT and T2T-ERG_XX has four HiFi and 19 ONT runs. HiFi sequencing data demonstrated high c…
Table 3	T2T Assembly N50 input sequencing stats	Supplementary Table 3: Summary of processed and merged sequencing data for T2T-ERG_XX, ERG_FATHER, and ERG_MOTHER across Illumina, Oxford Nanopore Technologies (ONT), and PacBio HiFi platforms. The coverage is computed for the genome length of CHM13. Illumina data has been downsampled by 50% for each sequencing file in Supplementary Table 1 and achieved a coverage of 46.73×. ONT and HiFi data are…
Table 4	T2T Assembly polishing strategy N50 stats	Supplementary Table 4: Summary of assembly strategies and performance metrics for maternal and paternal haplotypes of T2T-ERG_XX calculated before manually fixing one assembly error in the final maternal and paternal haplotype. The strategy incorporated combinations of assembly tools, including Verkko, ntLink (HiFi and ONT), RagTag, hifiasm, and quarTeT, with and without Ratatosk correction. The …
Table 5	T2T Assembly QC metrics POST	Supplementary Table 5: Analysis of maternal and paternal T2T-ERG_XX haplotypes derived from a single individual's genome using combined Verkko and HiFiASM assemblies. Metrics from QUAST, yak, and Inspector (see Methods) include contiguity, assembly size, alignment quality, and structural correctness. The maternal haplotype contains 80 contigs (largest: 251.6 Mb, N50: 153.4 Mb), while the paternal…
Table 6	T2T Assembly maternal / paternal gaps	Supplementary Table 6: Analysis of maternal and paternal T2T-ERG_XX haplotypes, detailing the start and end positions of gaps across chromosomes and their respective gap sizes. The table provides information on gaps identified in both haplotypes, spanning autosomal chromosomes, sex chromosomes, and mitochondrial DNA. Gap lengths range from 1 bp (e.g., T2TXXmatChrM) to 100,000 bp (e.g., chr19_RagT…
Table 7	Pangenome (57) Long read N50 sequencing stats	Supplementary Table 7: Sequencing data quality metrics for the HiFi data underlying pangenome assemblies across 27 trio (TA) and 30 single (SA) sample types for male (XY) and female (XX) individuals. Coverage values range from 25.53× to 52.42×, with ten samples marked for sequencing top-up to reach the 25x coverage cutoff.
Table 8	Pangenome(57) assembly QC metrics PRE	Supplementary Table 8: The raw assembly characteristics of 114 haplotypes from 57 samples were categorized by sample ID, sex, and type (TA: trio assembly or SA: single assembly). Metrics were generated using QUAST, Yak, and Inspector, as described in the methods. The table includes contiguity metrics such as the number of contigs per haplotype, which range from 233 to 836, and N50 values spanning…
Table 9	Pangenome(57) assembly QC metrics POST	Supplementary Table 9: The assembly characteristics of 114 haplotypes from 57 samples were categorized by sample ID, sex, and type (TA: trio assembly or SA: single assembly). Metrics were generated using QUAST, Yak, and Inspector after scaffolding, polishing, and error correction. The table includes contiguity metrics such as the number of contigs per haplotype, which range from 100 to 335, and N…
Table 10	Pangenome Graph edge, node stats VERTICAL	Supplementary Table 10: Comparison of graph assembly metrics across chromosomes for a cohort of 58 samples, with different backbones (GRCh38 and CHM13v2). The table details the number of edges, nodes, and graph lengths for each dataset. Edges range from 2,270 (chrM, CHM13v2 backbone) to 9.2 million (chr1, CHM13v2 backbone), with the total graph containing 121 million edges for CHM13v2 backbone, 1…
Table 11	Pangenome Graph growth-curve data	Supplementary Table 11: Pangenome graph growth curve data underlying Figure 4a illustrates the ordered growth of the graph in base pairs (bp) for multiple samples. Metrics are shown for single-sample growth, incremental growth with additional samples (e.g., 1, 2, 3, up to 58 genomes). The data includes growth curves for panacus-based ordered-growth increments. Growth metrics reveal initial rapid …
Table 12	Pangenome GraphTotal Variant Counts for three graph configurations	Supplementary Table 12: The number of variants in the pangenome graph incorporating the maternal Emirati T2T haplotype (T2T-ERG_XX) was calculated for 57 Emirati genomes. The table reports the total number of variant records, categorized into SNPs, MNPs, indels, other variant types, multiallelic sites, and multiallelic SNP sites. Comparisons between graphs with different backbone reference highli…
Table 13	Pangenome paths complete	Supplementary Table 13: Minigraph-Cactus graph paths for the Emirati T2T pangenome graph with CHM13 backbone.
Table 14	T2TAssembly contig to linear reference alignment stats	Supplementary Table 14: Comparison of CHM13 and T2T-ERG_XX T2T chromosome assembly metrics for maternal (ERG_XX#2) and paternal (ERG_XX#1) T2T haplotypes. The table includes the mapping between CHM13 chromosomes and corresponding T2T chromosomes (RagTag paths), along with path length, percentage of CHM13 coverage, T2T and CHM13 chromosome lengths, and the number of gaps in each T2T chromosome. Pa…
Table 15	Pangenome (57) contig to linear reference alignment stats	Supplementary Table 15: Longest contig path per pangenome haplotype in relation to CHM13 chromosomes across all 58 assemblies. The percentage indicates the proportion of each contig assigned to its respective CHM13 chromosome relative to the total chromosome length. Autosomes show a median coverage of 94.55% (range: 46.38% to 99.33%). Chromosome X, in female haplotypes and male haplotype 2, exhib…
Table 16	Pangenome assembly N regions	Supplementary Table 16: N regions in the 58 pangenome assemblies in the respective assembly's coordinates. For mapping these contigs to CHM13, refer to Suppl. Tably Y. Ordering is primarily according to Sample ID, then haplotype and then contig name.
Table 17	Uncovered CHM13 regions	Supplementary Table 17: The CHM13 regions that are not covered by pangenome graph paths of any of the 58 Emirati T2T pangenome assemblies including T2T-ERG_XX.
Table 18	Pangenome Graph Variant Counts linear alignments and graph configurations	Supplementary Table 18: SNP counts for 58 pangenome assemblies as reported by the Minigraph-Cactus pipeline for the CHM13 backbone and GRCh38 backbone graph with respect to CHM13 and GRCh38 are provided. For comparison, the number of SNP calls obtained by HiFi sequencing data-based SNP calling with Sention with respect to CHM13 and GRCh38 is provided. Ordering is according to the growth curve in …
Table 19	Pangenome (57) Admixture, Sex, Assembly Type	Supplementary Table 19: Overview of sample metadata, including sex, assembly type (single assembly (SA) or trio assembly (TA)), ancestry proportions (European (EUR), South Asian (SAS), American (AMR), African (AFR), and East Asian (EAS)), and the main ancestry component for each sample, defined as the ancestry with the highest proportional value. The table summarizes data for 57 samples from two …
Table 20	HLA Haplotype stratification	Supplementary Table 20: HLA haplotypes stratified by maternal and paternal assembly haplotype. The table summarizes the occurrence of major structural haplotypes, including the HLA-Y insertion, the multi-gene deletion spanning HLA-H, HCG4B, HLA-K, and HLA-U, and the rare HLA-H insertion haplotype. Counts and frequencies are reported separately for maternal and paternal haplotypes.
Table 21	Short-read (119) to Pangenome Graph alignments	Supplementary Table 21: Assessment of different linear and graph-based genomic references using Illumina short-read whole-genome sequencing data from n=119 Emirati individuals generated using the NovaSeq 6000 platform. The table evaluates mapping, coverage, duplication rates, and variant calling metrics across multiple references, including GRCh38, CHM13, and graph-based pangenomes. These graphs …
Table 22	Truth set hap.py evaluation for linear and graph references	Supplementary Table 22: Performance metrics for variant calling using short- and long-read NGS data across three references (linear GRCh38, KU pangenome, and HPRC pangenome) against GIAB truth sets (HG001–HG007). Evaluation metrics include recall, precision, F1 Score, and Matthews Correlation Coefficient (MCC), along with detailed counts for true positives (TP), false negatives (FN), false positi…
Table 23	Tools and versions	Supplementary Table 23: List of computational tools, software packages, and their corresponding versions used in the respective analyses throughout this study. The table details the specific role of each tool (e.g., assembly, alignment, variant calling, graph construction, phasing, and visualization), along with version numbers and references, to ensure reproducibility and transparency of all ana…

## Sheet: Supplementary_1
Supplementary Table 1: Summary of Illumina short-read sequencing data generated using the NovaSeq 6000 platform. Sequencing was performed with a read length of 150 bp, yielding coverage exceeding 90X for all individuals. Coverage was calculated based on the CHM13 genome length.
Individual	Sample name	Sequences [#]	Coverage
ERG_FATHER	02479_2	1149496469	109
ERG_MOTHER	02480_3	981090174	93.06
ERG_XX	02484_2	985737452	93.48

## Sheet: Supplementary_2
Supplementary Table 2: Summary of long-read sequencing data generated for ERG_FATHER, ERG_MOTHER, and T2T-ERG_XX using PacBio HiFi and Oxford Nanopore Technologies (ONT) platforms. Coverage is computed for the genome length of CHM13. ERG_FATHER has two HiFi and one ONT run, ERG_MOTHER has three HiFi and one ONT and T2T-ERG_XX has four HiFi and 19 ONT runs. HiFi sequencing data demonstrated high c…
Individual	Platfom	Sequencing file	Sequences [#]	Bases [#]	N50	min	max	N75	N90	auN	Coverage
ERG_FATHER	HiFi	Prime_2479_F_XY_1_B01_hifi1.fastq.gz	6510261	92284573932	15154	193	45624	12680	10634	6.49601e+06	29.6
ERG_FATHER	HiFi	Prime_2479_F_XY_A01_hifi2.fastq.gz	7311817	104147392472	15180	79	49452	12695	10663	7.30494e+06	33.41
ERG_MOTHER	HiFi	Prime_2480_M_XX_1_C01_hifi1.fastq.gz	14	201235	14882	9569	18995	13393	11761	14734.1	0
ERG_MOTHER	HiFi	Prime_2480_M_XX_A01_hifi5.fastq.gz	6422783	92013451739	16081	93	49989	13079	10195	5.39848e+06	29.52
ERG_MOTHER	HiFi	Prime_2480_M_XX_B01_hifi3.fastq.gz	7739786	107678316258	14778	92	55333	12357	10385	7.9188e+06	34.54
ERG_XX	HiFi	Prime_2484_C_XX_2_A01_hifi1.fastq.gz	6501663	99467697090	16831	92	56751	13721	10965	5.65474e+06	31.91
ERG_XX	HiFi	Prime_2484_C_XX_2_B01_hifi2.fastq.gz	6247126	96820301659	16955	87	59547	13867	11146	5.53491e+06	31.06
ERG_XX	HiFi	Prime_2484_C_XX_2_C01_hifi3.fastq.gz	5756259	100714264601	19045	72	57845	15673	12757	5.25209e+06	32.31
ERG_XX	HiFi	Prime_2484_C_XX_2_D01_hifi4.fastq.gz	5646109	97762736574	18975	124	61958	15604	12654	5.09078e+06	31.36
ERG_FATHER	ONT	Prime_2479_F_XY_ONT1.fastq.gz	21318803	99237727182	7193	1	361684	3845	2169	5.4117e+06	31.83
ERG_MOTHER	ONT	Prime_2480_M_XX_ONT1.fastq.gz	20027339	95802018030	7621	1	517172	3990	2192	4.87972e+06	30.73
ERG_XX	ONT	Prime_2484_C_XX_ONT2.fastq.gz	20177138	95349865275	7416	1	304659	3863	2210	5.10357e+06	30.73
ERG_XX	ONT	Prime_2484_C_XX_ONT3.fastq.gz	142336	4025433830	52460	38	380321	22961	14459	98643.7	1.29
ERG_XX	ONT	Prime_2484_C_XX_ONT4.fastq.gz	29741	1125396879	67876	61	503655	41182	22558	87664.1	0.36
ERG_XX	ONT	Prime_2484_C_XX_B1_ONT5.fastq.gz	28930	141621816	15748	62	259110	3242	1577	49182.3	0.05
ERG_XX	ONT	Prime_2484_C_XX_B2_ONT5.fastq.gz	217910	1078585597	12182	61	366822	3289	1681	80584.7	0.35
ERG_XX	ONT	Prime_2484_C_XX_B1_ONT6.fastq.gz	1008859	26783805733	78840	61	463546	43757	18494	236534	8.59
ERG_XX	ONT	Prime_2484_C_XX_B2_ONT6.fastq.gz	742462	27176313299	80186	55	447664	46783	23376	241371	8.72
ERG_XX	ONT	Prime_2484_C_XX_ONT7.fastq.gz	4100	14296806	4839	62	140007	2371	1414	18247.7	0
ERG_XX	ONT	Prime_2484_C_XX_ONT8.fastq.gz	401831	13126233463	87807	30	1633523	42107	18190	167651	4.21
ERG_XX	ONT	Prime_2484_C_XX_ONT9.fastq.gz	1549016	51538176956	69125	49	1793990	35272	17471	369227	16.53
ERG_XX	ONT	Prime_2484_C_XX_MODIFIED_ONT10.fastq.gz	399532	14200015851	78470	9	1012076	38857	18403	166023	4.56
ERG_XX	ONT	Prime_2484_C_XX_NORMAL_ONT10.fastq.gz	199401	8352747450	101515	11	1097432	50333	23523	161812	2.68
ERG_XX	ONT	Prime_2484_C_XX_STAR_ONT11.fastq.gz	374846	11548832596	67843	54	625897	38959	19451	150076	3.7
ERG_XX	ONT	Prime_2484_C_XX_NOSTAR_ONT11.fastq.gz	268253	8961742757	58279	28	467814	36154	19671	138187	2.87
ERG_XX	ONT	Prime_2484_C_XX_B1_ONT12.fastq.gz	161463	4166646152	44702	47	234557	26088	13963	91747.4	1.34
ERG_XX	ONT	Prime_2484_C_XX_B2_ONT12.fastq.gz	179763	7312496909	68218	21	325795	41916	23116	125493	2.35
ERG_XX	ONT	Prime_2484_C_XX_B3_ONT12.fastq.gz	5575	156069953	66668	113	241136	34701	15066	73751.2	0.05
ERG_XX	ONT	2484_FRESH_Raw_Merged.fastq.gz	659918	34320361676	90854	18	563740	53597	28990	271726	11.01
ERG_XX	ONT	2484_FROZEN_Merged_Raw_ONT.fastq.gz	1213445	46036421420	73836	55	697437	41359	21253	347148	14.77

## Sheet: Supplementary_3
Supplementary Table 3: Summary of processed and merged sequencing data for T2T-ERG_XX, ERG_FATHER, and ERG_MOTHER across Illumina, Oxford Nanopore Technologies (ONT), and PacBio HiFi platforms. The coverage is computed for the genome length of CHM13. Illumina data has been downsampled by 50% for each sequencing file in Supplementary Table 1 and achieved a coverage of 46.73×. ONT and HiFi data are…
Individual	Platform	Sample Name	Sequences [#]	Bases [#]	N50	Min. length	Max. length	N75	N90	auN	Coverage
ERG_XX	Illumina	Prime_2484_C_XX_ILLN_subsampled.fastq.gz	985742416	145686069113	149	23	150	149	149	4.99698e+10	46.73
ERG_XX	ONT	Prime_2484_C_XX_INITIAL-TOPUP_Merged_ONT_Preprocessed.fastq.gz	42406789	348531985174	16928	1	824775	7200	3390	7.23992e+06	111.806
ERG_XX	HiFi	Prime_2484_C_XX_Merged.fastq.gz	24151157	394764999924	17934	72	61958	14629	11749	2.10115e+07	126.637
ERG_FATHER	HiFi	Prime_2479_F_XY_Merged.fastq.gz	13822078	196431966404	15167	79	49452	12688	10649	1.37848e+07	63.0137
ERG_MOTHER	HiFi	Prime_2480_M_XX_Merged.fastq.gz	14162583	199691969232	15339	92	55333	12628	10317	1.30463e+07	64.0594

## Sheet: Supplementary_4
Supplementary Table 4: Summary of assembly strategies and performance metrics for maternal and paternal haplotypes of T2T-ERG_XX calculated before manually fixing one assembly error in the final maternal and paternal haplotype. The strategy incorporated combinations of assembly tools, including Verkko, ntLink (HiFi and ONT), RagTag, hifiasm, and quarTeT, with and without Ratatosk correction. The …
Assembly Strategy	Haplotype	Contigs [#]	Bases [#]	N50	N90	auN	L50	L90	QV Score	Switch Error	Harming Error
CHM13v2.0 reference genome	NA	25	3117292070	150617247	80542538	1.54571e+08	9	19	>60	NA	NA
verkko	maternal	151	3026631944	150989924	64531624	1.49707e+08	8	20	61.067	0.020009	0.072962
verkko, ntLink (HiFi)	maternal	124	3026354642	152308345	64531624	1.50043e+08	8	20	60.549	0.020011	0.072971
verkko, ntLink (HiFi), ntLink (ONT)	maternal	116	3026272283	152308345	64531624	1.50164e+08	8	20	60.519	0.02001	0.072971
verkko, RagTag	maternal	101	3026636944	151177405	81119295	1.55459e+08	8	19	61.018	0.020014	0.072986
verkko, ntLink (HiFi), ntLink (ONT), RagTag	maternal	80	3026275883	152495826	83781872	1.55677e+08	8	19	60.903	0.020014	0.072994
verkko, RagTag, ntLink (HiFi), ntLink (ONT)	maternal	90	3026604552	151177405	81119295	1.55461e+08	8	19	60.542	0.020017	0.072993
verkko, ntLink (ONT haplotyped reads)	maternal	126	3026385367	152308343	64531624	1.49929e+08	8	20	60.798	0.020011	0.072975
verkko, quarTeT (hifiasm)	maternal	151	3027723102	150989924	64531624	1.49749e+08	8	20	61.047	0.02002	0.073005
verkko, ntLink (HiFi), ntLink (ONT), RagTag, quarTeT (with hifiasm, quarTeT assembly and with ratatosk-corrected hifiasm, quarTeT assembly)	maternal	80	3031155000	153447322	83781872	1.55837e+08	8	19	60.802	0.020018	0.072981
verkko, RagTag, ntLink (HiFi), ntLink(ONT), quarTeT (with hifiasm, quarTeT assembly and with ratatosk-corrected hifiasm, quarTeT assembly)	maternal	90	3032467420	152128901	81119295	1.55667e+08	8	19	60.382	0.020031	0.072989
verkko	paternal	195	3029059953	153759740	61055022	1.45486e+08	8	21	60.756	0.032426	0.181066
verkko, ntLink (HiFi)	paternal	169	3028749091	162158314	65357666	1.53123e+08	8	19	60.574	0.03243	0.18117
verkko, ntLink(Hifi), ntLink (ONT)	paternal	153	3028375639	162158314	65357666	1.53294e+08	8	19	61.118	0.032429	0.181761
verkko, RagTag	paternal	118	3029067653	155985839	81486103	1.55223e+08	8	19	59.318	0.032438	0.181398
verkko, ntLink (HiFi), ntLink (ONT), RagTag	paternal	100	3028380939	162208718	81486103	1.61017e+08	8	18	60.903	0.032436	0.181856
verkko, RagTag, ntLink (HiFi), ntLink(ONT)	paternal	114	3029026591	155985839	81486103	1.55237e+08	8	19	60.542	0.032437	0.181444
verkko, ntLink (ONT haplotyped reads)	paternal	160	3028486703	153759740	65357666	1.47306e+08	8	20	61.118	0.032427	0.181325
verkko, quarTeT(hifiasm)	paternal	195	3032395309	153832224	61059004	145585516	8	21	60.692	0.032388	0.180838
verkko, ntLink (HiFi), ntLink (ONT), RagTag, quarTeT (with hifiasm, quarTeT assembly and with ratatosk-corrected hifiasm, quarTeT assembly)	paternal	100	3032213843	162208718	81486103	1.61169e+08	8	18	59.843	0.032404	0.181627
verkko, RagTag, ntLink (HiFi), ntLink (ONT), quarTeT (with hifiasm, quarTeT assembly and with ratatosk-corrected hifiasm, quarTeT assembly)	paternal	114	3033446635	156062501	81486103	1.55398e+08	8	19	59.171	0.032406	0.181211

## Sheet: Supplementary_5
Supplementary Table 5: Analysis of maternal and paternal T2T-ERG_XX haplotypes derived from a single individual's genome using combined Verkko and HiFiASM assemblies. Metrics from QUAST, yak, and Inspector (see Methods) include contiguity, assembly size, alignment quality, and structural correctness. The maternal haplotype contains 80 contigs (largest: 251.6 Mb, N50: 153.4 Mb), while the paternal…
Sample_ID	Sex	haplotype	# contigs (>= 0 bp)	# contigs (>= 1000 bp)	# contigs (>= 5000 bp)	# contigs (>= 10000 bp)	# contigs (>= 25000 bp)	# contigs (>= 50000 bp)	Total length (>= 0 bp)	Total length (>= 1000 bp)	Total length (>= 5000 bp)	Total length (>= 10000 bp)	Total length (>= 25000 bp)	Total length (>= 50000 bp)	# contigs	Largest contig	Total length	Reference length	GC (%)	Reference GC (%)	N50	NG50	N90	NG90	auN	auNG	L50	LG50	L90	LG90	# misassemblies	# misassembled contigs	Misassembled contigs length	# local misassemblies	# scaffold gap ext. mis.	# scaffold gap loc. mis.	# possible TEs	# unaligned mis. contigs	# unaligned contigs	Unaligned length	Genome fraction (%)	Duplication ratio	# N per 100 kbp	# mismatches per 100 kbp	# indels per 100 kbp	# genomic features	Largest alignment	Total aligned length	NA50
ERG_XX	XX	maternal	80	80	80	79	76	38	3031155000	3031155000	3031155000	3031148266	3031086081	3029644570	80	251596214	3031155000	3117292070	40.83	40.75	153447322	145825839	83781872	83781872	1.55837e+08	1.51531e+08	8	9	19	19	8575	27	3027833594	9592	0	1	442	0	0 + 25 part	32549508	94.381	1.017	2.21	143.19	25.57	61802 + 258 part	138326602	2990868956	59783020
ERG_XX	XX	paternal	100	100	100	96	78	45	3032213843	3032213843	3032213843	3032178837	3031826342	3030612610	100	247622566	3032213843	3117292070	40.83	40.75	162208718	162208718	81486103	65405299	1.61169e+08	1.56771e+08	8	8	18	19	6735	40	3030179399	10207	0	2	360	0	0 + 31 part	29247543	94.399	1.018	7.1	135.36	24.31	61884 + 292 part	137393127	2994216774	59774708
[truncated: 35 more columns]

## Sheet: Supplementary_6
Supplementary Table 6: Analysis of maternal and paternal T2T-ERG_XX haplotypes, detailing the start and end positions of gaps across chromosomes and their respective gap sizes. The table provides information on gaps identified in both haplotypes, spanning autosomal chromosomes, sex chromosomes, and mitochondrial DNA. Gap lengths range from 1 bp (e.g., T2TXXmatChrM) to 100,000 bp (e.g., chr19_RagT…
Haplotype	Chromosome start	Position start	Chromosome end	Position end	Gap length
maternal	chr1_RagTag	664248	chr1_RagTag	664347	100
maternal	chr1_RagTag	1320152	chr1_RagTag	1320251	100
maternal	chr1_RagTag	1368233	chr1_RagTag	1368332	100
maternal	chr1_RagTag	11821225	chr1_RagTag	11828724	7500
maternal	chr10_RagTag	49595	chr10_RagTag	49694	100
maternal	chr10_RagTag	128786821	chr10_RagTag	128794320	7500
maternal	chr11_RagTag	75712	chr11_RagTag	75811	100
maternal	chr13_RagTag	8914826	chr13_RagTag	8914925	100
maternal	chr13_RagTag	33197937	chr13_RagTag	33205436	7500
maternal	chr16_RagTag	16199421	chr16_RagTag	16199520	100
maternal	chr16_RagTag	16222608	chr16_RagTag	16222707	100
maternal	chr17_RagTag	47529307	chr17_RagTag	47531316	2010
maternal	chr17_RagTag	47598337	chr17_RagTag	47605836	7500
maternal	chr17_RagTag	84263614	chr17_RagTag	84263713	100
maternal	chr17_RagTag	84489602	chr17_RagTag	84489701	100
maternal	chr19_RagTag	38456	chr19_RagTag	38555	100
maternal	chr19_RagTag	2443305	chr19_RagTag	2444984	1680
maternal	chr2_RagTag	34355	chr2_RagTag	34454	100
maternal	chr2_RagTag	138747	chr2_RagTag	138846	100
maternal	chr2_RagTag	125572662	chr2_RagTag	125580161	7500
maternal	chr20_RagTag	55328	chr20_RagTag	55427	100
maternal	chr20_RagTag	926548	chr20_RagTag	929157	2610
maternal	chr3_RagTag	201722517	chr3_RagTag	201722616	100
maternal	chr3_RagTag	201753034	chr3_RagTag	201753133	100
maternal	chr5_RagTag	6631830	chr5_RagTag	6633329	1500
maternal	chr7_RagTag	113185806	chr7_RagTag	113193305	7500
maternal	chr8_RagTag	51105	chr8_RagTag	51204	100
maternal	chr8_RagTag	79153	chr8_RagTag	79252	100
maternal	chr9_RagTag	43465357	chr9_RagTag	43465456	100
maternal	chr9_RagTag	139509266	chr9_RagTag	139510765	1500
maternal	chrX_RagTag	18243	chrX_RagTag	18342	100
maternal	chrX_RagTag	46597	chrX_RagTag	46696	100
maternal	chrX_RagTag	1098753	chrX_RagTag	1098852	100
maternal	chrX_RagTag	1138878	chrX_RagTag	1138977	100
maternal	chrX_RagTag	2661689	chrX_RagTag	2664427	2739
maternal	chrX_RagTag	99745992	chrX_RagTag	99753491	7500
maternal	T2TXXmatChrM	3109	T2TXXmatChrM	3109	1
paternal	chr1_RagTag	120054361	chr1_RagTag	120061860	7500
paternal	chr1_RagTag	246942777	chr1_RagTag	246942876	100
paternal	chr1_RagTag	246993205	chr1_RagTag	246993304	100
paternal	chr1_RagTag	247032425	chr1_RagTag	247032524	100
paternal	chr1_RagTag	247541187	chr1_RagTag	247541286	100
paternal	chr1_RagTag	247561286	chr1_RagTag	247561385	100
paternal	chr1_RagTag	247583296	chr1_RagTag	247583395	100
paternal	chr10_RagTag	48350202	chr10_RagTag	48350301	100
paternal	chr11_RagTag	36590	chr11_RagTag	36689	100
paternal	chr12_RagTag	110390540	chr12_RagTag	110398039	7500
paternal	chr13_RagTag	6238533	chr13_RagTag	6238632	100
paternal	chr13_RagTag	8221380	chr13_RagTag	8221479	100
paternal	chr13_RagTag	112312952	chr13_RagTag	112313051	100
paternal	chr15_RagTag	3351110	chr15_RagTag	3351209	100
paternal	chr15_RagTag	3891152	chr15_RagTag	3891251	100
paternal	chr15_RagTag	3932877	chr15_RagTag	3932976	100
paternal	chr15_RagTag	3961204	chr15_RagTag	3961303	100
paternal	chr15_RagTag	3975077	chr15_RagTag	3975176	100
paternal	chr16_RagTag	18516818	chr16_RagTag	18516917	100
paternal	chr16_RagTag	18590517	chr16_RagTag	18590616	100
paternal	chr17_RagTag	46646	chr17_RagTag	46745	100
paternal	chr17_RagTag	666196	chr17_RagTag	666295	100
paternal	chr17_RagTag	19649699	chr17_RagTag	19657198	7500
paternal	chr17_RagTag	81854770	chr17_RagTag	81862269	7500
paternal	chr18_RagTag	4524870	chr18_RagTag	4526369	1500
paternal	chr18_RagTag	69609202	chr18_RagTag	69616701	7500
paternal	chr19_RagTag	34420	chr19_RagTag	34519	100
paternal	chr19_RagTag	61084	chr19_RagTag	61183	100
paternal	chr19_RagTag	59071398	chr19_RagTag	59171397	100000
paternal	chr19_RagTag	62083575	chr19_RagTag	62083674	100
paternal	chr2_RagTag	22517	chr2_RagTag	22616	100
paternal	chr2_RagTag	61660	chr2_RagTag	61759	100
paternal	chr2_RagTag	123488688	chr2_RagTag	123491361	2674
paternal	chr20_RagTag	47534	chr20_RagTag	47633	100
paternal	chr21_RagTag	680489	chr21_RagTag	680588	100
paternal	chr21_RagTag	36210617	chr21_RagTag	36218116	7500
paternal	chr22_RagTag	501372	chr22_RagTag	501471	100
paternal	chr22_RagTag	21143939	chr22_RagTag	21151438	7500
paternal	chr22_RagTag	25644721	chr22_RagTag	25652220	7500
paternal	chr22_RagTag	28430946	chr22_RagTag	28438445	7500
paternal	chr3_RagTag	37202	chr3_RagTag	37301	100
paternal	chr3_RagTag	73333	chr3_RagTag	73432	100
paternal	chr4_RagTag	26516	chr4_RagTag	26615	100
paternal	chr5_RagTag	48118	chr5_RagTag	48217	100
paternal	chr5_RagTag	73883	chr5_RagTag	73982	100
paternal	chr5_RagTag	109238	chr5_RagTag	109337	100
paternal	chr7_RagTag	26390	chr7_RagTag	26489	100
paternal	chr7_RagTag	50305	chr7_RagTag	50404	100
paternal	chr9_RagTag	44989046	chr9_RagTag	44989145	100
paternal	chrX_RagTag	40939	chrX_RagTag	41038	100
paternal	chrX_RagTag	73361	chrX_RagTag	73460	100
paternal	chrX_RagTag	99022	chrX_RagTag	99121	100
paternal	chrX_RagTag	6253691	chrX_RagTag	6261190	7500
paternal	chrX_RagTag	71453587	chrX_RagTag	71455086	1500
paternal	chrX_RagTag	71489640	chrX_RagTag	71497139	7500
paternal	chrX_RagTag	131199253	chrX_RagTag	131206752	7500
paternal	chrX_RagTag	154084398	chrX_RagTag	154084497	100
paternal	chrX_RagTag	154139234	chrX_RagTag	154139333	100
paternal	chrX_RagTag	154328692	chrX_RagTag	154328791	100
paternal	chrX_RagTag	154372912	chrX_RagTag	154373011	100
paternal	chrX_RagTag	154452324	chrX_RagTag	154452423	100
paternal	chrX_RagTag	155288115	chrX_RagTag	155288214	100
paternal	chr14_RagTag_part1	24871961	chr14_RagTag_part1	24879460	7500
paternal	chr14_RagTag_part2	79978144	chr14_RagTag_part2	79985643	7500

## Sheet: Supplementary_7
Supplementary Table 7: Sequencing data quality metrics for the HiFi data underlying pangenome assemblies across 27 trio (TA) and 30 single (SA) sample types for male (XY) and female (XX) individuals. Coverage values range from 25.53× to 52.42×, with ten samples marked for sequencing top-up to reach the 25x coverage cutoff.
sample_ID	Sex	Type	sequences [#]	bases [#]	Read N50	Read min	Read max	Read N75	Read N90	Read auN	Coverage CHM13	Topup
GDXX1	XX	TA	8206032	125000000000	16976	152	55643	13714	11010	6.7999e+06	40.0597	yes
GDXX10	XX	TA	5745711	90155456177	17096	315	61439	14155	11538	5.35634e+06	28.9211
GDXX11	XX	TA	9464320	112000000000	13042	156	46368	10281	8022	7.48176e+06	35.7924	yes
GDXX12	XX	TA	8138904	115000000000	16224	128	52197	12710	9376	5.71975e+06	36.901	yes
GDXX13	XX	TA	6579124	98945846950	16822	252	48595	13763	10774	5.76874e+06	31.741
GDXX14	XX	TA	7174875	101000000000	15475	331	55296	12741	10126	6.39183e+06	32.445
GDXX15	XX	TA	6241993	93518005002	17764	450	60665	14212	10255	4.59237e+06	29.9998
GDXX2	XX	TA	7680344	107000000000	17006	76	52522	13145	8724	4.89023e+06	34.4021	yes
GDXX3	XX	TA	6916654	94614942109	14828	251	51915	12325	10174	6616624	30.3516
GDXX4	XX	TA	7648722	105000000000	16447	210	51620	12569	8461	4.94914e+06	33.5796	yes
GDXX5	XX	TA	6007014	90583854875	16250	117	48627	13509	11147	5.79675e+06	29.0585
GDXX6	XX	TA	6305545	94100960846	16028	251	51403	13395	11153	6.20034e+06	30.1868
GDXX7	XX	TA	6503306	91160601918	16588	256	54361	13330	9535	4.91294e+06	29.2435
GDXX8	XX	TA	8443824	122000000000	16775	70	51747	13307	9911	6.18543e+06	39.1295	yes
GDXX9	XX	TA	6076272	84893427904	15491	305	44593	12793	10283	5.48276e+06	27.2331
GDXY1	XY	TA	6705275	102000000000	16484	284	58100	13629	11179	6.33618e+06	32.6196
GDXY10	XY	TA	8830841	121000000000	15989	127	48730	12534	9218	6.04689e+06	38.9735	yes
GDXY11	XY	TA	6546800	96237515261	16370	329	50348	13539	10811	5.84886e+06	30.8722
GDXY2	XY	TA	8502527	128000000000	17204	179	48691	14030	10896	7.05637e+06	41.0608
GDXY3	XY	TA	6364298	95416631210	16153	356	60290	13394	11099	6.22516e+06	30.6088
GDXY5	XY	TA	6673438	99945895694	16436	329	43589	13577	10986	6.23024e+06	32.0618
GDXY6	XY	TA	5722307	89277884386	17075	252	54638	14153	11494	5.32695e+06	28.6396
GDXY7	XY	TA	6620836	95986126385	16452	294	46228	13474	10555	5.64071e+06	30.7915
GDXY8	XY	TA	7126650	107000000000	17184	86	60461	13462	10007	5.05725e+06	34.2112	yes
GDXY9	XY	TA	7653936	101000000000	14486	261	52578	11855	9444	6.74514e+06	32.4776
GHXX1	XX	SA	6463895	92478281484	16149	265	53507	13119	10121	5.34568e+06	29.6662
GHXX2	XX	SA	8561080	124000000000	17485	90	54423	13566	9469	5.82512e+06	39.7643	yes
GHXX3	XX	SA	7498008	99155719895	14841	263	58444	12284	9780	6.58407e+06	31.8083	yes
GHXX4	XX	SA	6322532	90961777972	15304	272	42580	12774	10777	6.46549e+06	29.1797
GHXY1	XY	SA	5133445	81387662105	18759	303	72344	15093	11088	3.9124e+06	26.1084
GHXY2	XY	SA	6396406	99877111257	16890	294	56120	14003	11517	6.15612e+06	32.0397
GHXY5	XY	SA	7028887	101000000000	15262	321	66313	12603	10595	6.62403e+06	32.4595
GHXY6	XY	SA	6590170	94808128581	15738	266	52043	13014	10591	6.13048e+06	30.4136
KDXX1	XX	TA	8023291	110000000000	16124	117	67322	12640	8634	5.59579e+06	35.2092
KDXX2	XX	TA	5837957	105000000000	19477	62	49592	16006	13044	5.41845e+06	33.6727
KHXX10	XX	SA	7398472	116000000000	18019	262	56718	14485	11081	5.80532e+06	37.066
KHXX11	XX	SA	5801623	90648737731	16997	259	61280	13783	11039	5.08045e+06	29.0793
KHXX14	XX	SA	5691371	87165780248	17053	276	50979	13989	11180	4.97183e+06	27.962
KHXX15	XX	SA	5503259	90718885457	18438	277	58024	14959	11759	4.6451e+06	29.1018
KHXX16	XX	SA	5317681	87422502799	18361	327	62748	14957	11923	4.58488e+06	28.0444
KHXX17	XX	SA	5802227	92191946968	18623	316	60516	14908	11346	4.43875e+06	29.5744
KHXX18	XX	SA	4602426	81390446630	20112	261	52299	16445	12976	3.91136e+06	26.1093
KHXX2	XX	SA	6369396	79582443000	14728	263	55384	11140	7921	4.28342e+06	25.5294
KHXX4	XX	SA	5830596	84744137276	15689	278	51513	13040	10747	5.67336e+06	27.1852
KHXX5	XX	SA	11209717	163000000000	16488	162	50586	13542	10657	9.6505e+06	52.4214
KHXX6	XX	SA	5789245	86102392911	16050	253	46955	13336	10946	5551784	27.6209
KHXX7	XX	SA	5269001	83430554496	17416	263	55099	14344	11638	4.82152e+06	26.7638
KHXX8	XX	SA	8503354	127000000000	17196	87	50091	13878	10590	6.84318e+06	40.683
KHXX9	XX	SA	6025862	93922264714	17215	270	47774	14188	11390	5.41694e+06	30.1294
KHXY1	XY	SA	7143122	97773661615	14717	275	51639	12245	10159	6.91251e+06	31.3649
KHXY11	XY	SA	5306732	84133778224	18107	291	51407	14620	11120	4.28476e+06	26.9894
KHXY12	XY	SA	5913818	91014605893	18559	260	63935	14840	10883	4.31946e+06	29.1967
KHXY13	XY	SA	5048881	88516190949	19854	251	57362	16210	12911	4.31833e+06	28.3952
KHXY14	XY	SA	5463035	84275999709	19251	295	58318	15241	9893	3.7427e+06	27.035
KHXY4	XY	SA	6096252	97757763102	17260	266	65381	14396	11931	5.88579e+06	31.3598
KHXY5	XY	SA	5471687	88731861898	18142	341	52043	14918	11883	4.81801e+06	28.4644
KHXY8	XY	SA	7473559	111000000000	17318	81	57180	13574	10031	5.41827e+06	35.7013

## Sheet: Supplementary_8
Supplementary Table 8: The raw assembly characteristics of 114 haplotypes from 57 samples were categorized by sample ID, sex, and type (TA: trio assembly or SA: single assembly). Metrics were generated using QUAST, Yak, and Inspector, as described in the methods. The table includes contiguity metrics such as the number of contigs per haplotype, which range from 233 to 836, and N50 values spanning…
sample_ID	Sex	haplotype	Type	main_pop	European	American	EastAsian	SouthAsian	African	# contigs (>= 0 bp)	# contigs (>= 1000 bp)	# contigs (>= 5000 bp)	# contigs (>= 10000 bp)	# contigs (>= 25000 bp)	# contigs (>= 50000 bp)	Total length (>= 0 bp)	Total length (>= 1000 bp)	Total length (>= 5000 bp)	Total length (>= 10000 bp)	Total length (>= 25000 bp)	Total length (>= 50000 bp)	# contigs	Largest contig	Total length	Reference length	GC (%)	Reference GC (%)	N50	NG50	N90	NG90	auN	auNG	L50	LG50	L90	LG90	# misassemblies	# misassembled contigs	Misassembled contigs length	# local misassemblies	# scaffold gap ext. mis.	# scaffold gap loc. mis.	# possible TEs	# unaligned mis. contigs	# unaligned contigs	Unaligned length	Genome fraction (%)	Duplication ratio
GDXY2	XY	paternal	TA	African	0.264204	0.165245	0.0068	0.105413	0.458338	502	502	502	501	383	308	2895949070	2895949070	2895949070	2895940279	2893584718	2891102762	502	137893497	2895949070	3117292070	40.85	40.75	46053944	40926393	7138125	1634859	54703842	5.08196e+07	19	22	73	132	6455	194	2038329484	8831	0	0	320	1	2 + 188 part	22931777	90.184	1.019
GDXY2	XY	maternal	TA	African	0.264204	0.165245	0.0068	0.105413	0.458338	486	486	486	486	390	299	3097244651	3097244651	3097244651	3097244651	3095260639	3092125401	486	146566787	3097244651	3117292070	40.8	40.75	50262055	50262055	12805994	12070839	5.59428e+07	5.5583e+07	20	20	65	66	10850	200	2314418544	13361	0	0	600	1	1 + 182 part	38366142	94.732	1.033
KHXX5	XX	paternal	SA	European	0.614483	1e-05	0.002251	0.266023	0.117233	233	233	233	233	232	206	3028354002	3028354002	3028354002	3028354002	3028333353	3027277823	233	153447256	3028354002	3117292070	40.82	40.75	71152359	71152359	17749519	10034534	74774113	7.26408e+07	15	15	45	51	5555	127	2334992903	10172	0	0	354	2	0 + 125 part	26396847	94.575	1.016
KHXX5	XX	maternal	SA	European	0.614483	1e-05	0.002251	0.266023	0.117233	254	254	254	254	253	234	3009102929	3009102929	3009102929	3009102929	3009087525	3008324586	254	134518115	3009102929	3117292070	40.85	40.75	67010042	65609084	12491950	9486760	67954108	6.55957e+07	15	16	53	61	4122	137	2588191940	9702	0	0	200	0	0 + 113 part	23556454	94.259	1.014
KHXX8	XX	paternal	SA	European	0.709955	1e-05	1e-05	0.20672	0.083306	248	248	248	248	247	221	3008107078	3008107078	3008107078	3008107078	3008082597	3007084602	248	138473681	3008107078	3117292070	40.87	40.75	74342033	67253726	14207446	8608471	7.00687e+07	6.76145e+07	15	16	51	59	5502	135	2439849486	8359	0	0	238	1	0 + 130 part	24003899	93.986	1.016
KHXX8	XX	maternal	SA	European	0.709955	1e-05	1e-05	0.20672	0.083306	276	276	276	276	276	258	3021573617	3021573617	3021573617	3021573617	3021573617	3020835057	276	140366621	3021573617	3117292070	40.83	40.75	54647875	52625809	10343796	6309223	5.90207e+07	5.72084e+07	19	20	66	77	5710	137	2443379757	10250	0	0	328	1	0 + 141 part	31874096	94.145	1.017
KHXX10	XX	paternal	SA	European	0.436299	1e-05	1e-05	0.287189	0.276492	279	279	279	279	279	252	3026261257	3026261257	3026261257	3026261257	3026261257	3025195556	279	133397059	3026261257	3117292070	40.82	40.75	60245984	58240322	11793450	7438893	6.13854e+07	5.95928e+07	18	19	59	68	4647	132	2263791073	10027	0	0	250	2	0 + 131 part	26054261	94.429	1.017
KHXX10	XX	maternal	SA	European	0.436299	1e-05	1e-05	0.287189	0.276492	259	259	259	258	258	246	3029453527	3029453527	3029453527	3029445539	3029445539	3028958675	259	135314749	3029453527	3117292070	40.86	40.75	69666801	69666801	10397455	6592328	6.6951e+07	6.50644e+07	16	16	54	63	7219	135	2560864937	10374	0	0	428	1	0 + 129 part	28989267	94.382	1.018
KHXY8	XY	paternal	SA	European	0.556374	1e-05	1e-05	0.38432	0.059286	305	305	305	305	305	280	2969511390	2969511390	2969511390	2969511390	2969511390	2968616407	305	179493960	2969511390	3117292070	40.79	40.75	51763162	51065605	8367037	4139435	6.5611e+07	6.25006e+07	17	18	63	87	6674	162	2284601976	9649	0	0	280	1	0 + 154 part	29003493	92.337	1.019
KHXY8	XY	maternal	SA	European	0.556374	1e-05	1e-05	0.38432	0.059286	307	307	307	307	307	285	2953060368	2953060368	2953060368	2953060368	2953060368	2952178780	307	126812762	2953060368	3117292070	40.82	40.75	59042987	53109922	7870890	3014885	61457772	58219925	17	18	59	90	7070	159	2551219130	10741	0	0	366	1	0 + 146 part	31852902	91.681	1.02
GDXY1	XY	paternal	TA	European	0.86357	0.098971	0.008648	1e-05	0.028801	536	536	536	535	451	394	2930089405	2930089405	2930089405	2930081617	2928448634	2926489081	536	143729483	2930089405	3117292070	40.84	40.75	59296784	55257508	5180180	1570895	6.39929e+07	6.015e+07	16	18	60	119	5870	261	2172672121	11056	0	0	284	6	0 + 246 part	28200856	91.205	1.019
GDXY1	XY	maternal	TA	European	0.86357	0.098971	0.008648	1e-05	0.028801	526	526	526	526	450	382	3053609245	3053609245	3053609245	3053609245	3052097929	3049534724	526	126839897	3053609245	3117292070	40.8	40.75	49499869	49499869	7955000	6229240	5.84439e+07	5.725e+07	19	19	66	74	7867	252	2365141196	10083	0	0	372	14	0 + 233 part	32279497	94.634	1.022
GDXX1	XX	paternal	TA	European	0.696203	0.070176	0.027016	0.039869	0.166736	344	344	344	343	277	212	3032655362	3032655362	3032655362	3032645682	3031308055	3029023338	344	175044972	3032655362	3117292070	40.83	40.75	85383987	67777400	13351008	10462809	7.00747e+07	6.81721e+07	15	16	51	57	7636	169	2378773567	9216	0	0	422	1	1 + 142 part	27136492	94.436	1.019
GDXX1	XX	maternal	TA	European	0.696203	0.070176	0.027016	0.039869	0.166736	317	317	317	317	255	201	3028106361	3028106361	3028106361	3028106361	3026825163	3025107910	317	111636151	3028106361	3117292070	40.83	40.75	67070156	62904854	16516245	12475098	6.39846e+07	62153961	17	18	50	56	7956	154	2462772941	10461	0	0	442	3	0 + 141 part	28121413	94.215	1.019
GDXY3	XY	paternal	TA	African	0.300749	0.137448	1e-05	0.1782	0.383593	496	496	496	496	393	320	2935913317	2935913317	2935913317	2935913317	2933887806	2931259280	496	135992232	2935913317	3117292070	40.83	40.75	49984163	47462004	7668366	2328981	6.20911e+07	5.84784e+07	16	18	67	105	7057	224	2096270241	11985	0	0	304	3	0 + 213 part	26046560	91	1.023
GDXY3	XY	maternal	TA	African	0.300749	0.137448	1e-05	0.1782	0.383593	518	518	518	517	408	362	3048461797	3048461797	3048461797	3048453403	3046441749	3044809994	518	123118350	3048461797	3117292070	40.8	40.75	44276481	42886776	6457693	4531450	50269550	4.91596e+07	22	23	80	91	7603	255	2185297007	11733	0	0	418	1	0 + 233 part	24567946	94.638	1.022
GDXX2	XX	paternal	TA	European	0.371697	0.165377	1e-05	0.329859	0.133058	381	381	380	378	325	278	3023593782	3023593782	3023588977	3023572821	3022469319	3020907375	381	114516996	3023593782	3117292070	40.83	40.75	55740152	54804320	10152676	5449881	5.56437e+07	5.39712e+07	19	20	64	75	6495	152	2000479128	9816	0	0	426	2	0 + 146 part	31969153	94.352	1.015
GDXX2	XX	maternal	TA	European	0.371697	0.165377	1e-05	0.329859	0.133058	384	384	384	383	334	277	3022182565	3022182565	3022182565	3022174198	3021195180	3019228511	384	132789272	3022182565	3117292070	40.85	40.75	50595408	46716487	9120836	5522352	5.47876e+07	5.3116e+07	20	21	66	78	5801	168	2298945088	10170	0	0	298	0	0 + 155 part	27698748	94.25	1.017
GDXX3	XX	paternal	TA	South Asian	0.281613	0.267963	0.001565	0.348099	0.10076	535	535	535	533	469	398	3027484278	3027484278	3027484278	3027465357	3026263564	3023591459	535	103939317	3027484278	3117292070	40.83	40.75	39251083	37421341	5597677	3989381	4.82701e+07	4.68795e+07	22	23	88	105	6740	211	1754393456	10176	0	0	394	1	1 + 211 part	27753295	94.332	1.018
GDXX3	XX	maternal	TA	South Asian	0.281613	0.267963	0.001565	0.348099	0.10076	518	518	518	517	444	408	3025043245	3025043245	3025043245	3025037224	3023698333	3022297503	518	124798200	3025043245	3117292070	40.84	40.75	36965838	35373079	5677585	3817397	44840020	4.35131e+07	25	27	89	107	7765	209	1716221391	9318	0	0	458	2	0 + 201 part	22230868	94.184	1.02
GDXX4	XX	paternal	TA	European	0.486472	0.219555	0.001507	0.242582	0.049883	474	474	474	471	406	333	3035227621	3035227621	3035227621	3035200946	3033924854	3031310484	474	131874940	3035227621	3117292070	40.84	40.75	47525323	47525323	8463167	5047130	5.77481e+07	5.62279e+07	20	20	67	78	6951	199	2291705474	9499	0	0	430	2	0 + 192 part	22751744	94.806	1.017
GDXX4	XX	maternal	TA	European	0.486472	0.219555	0.001507	0.242582	0.049883	457	457	457	457	396	328	3026995838	3026995838	3026995838	3026995838	3025799624	3023403314	457	138021655	3026995838	3117292070	40.86	40.75	49896831	49868935	8383830	4796317	5.78453e+07	5.61697e+07	19	20	70	83	7243	226	2436734572	10228	0	0	402	3	0 + 205 part	25774935	94.224	1.019
GDXX5	XX	paternal	TA	African	0.225892	0.146541	0.009152	0.185776	0.432639	437	437	437	436	359	310	3020205862	3020205862	3020205862	3020196970	3018708939	3016977219	437	165274409	3020205862	3117292070	40.85	40.75	54836646	50550875	7727953	3823601	5.85565e+07	5.67328e+07	18	19	77	92	6930	177	1976051883	9636	0	0	396	1	0 + 176 part	27288067	94.084	1.018
GDXX5	XX	maternal	TA	African	0.225892	0.146541	0.009152	0.185776	0.432639	420	420	419	419	346	302	3024818091	3024818091	3024815436	3024815436	3023390241	3021772011	419	138813373	3024815436	3117292070	40.85	40.75	42790594	41489496	6545247	4329936	5.25549e+07	5.09958e+07	21	22	78	93	5861	192	2111102733	10045	0	0	258	0	0 + 191 part	25443935	94.441	1.017
GDXY5	XY	paternal	TA	European	0.996935	1e-05	0.003035	1e-05	1e-05	461	461	461	460	393	332	2923036442	2923036442	2923036442	2923030869	2921736265	2919576106	461	159494026	2923036442	3117292070	40.82	40.75	54700813	52625523	7202960	2166892	6.03251e+07	5.65659e+07	17	19	71	121	6716	210	2130523853	10230	0	0	390	2	0 + 190 part	26177598	90.851	1.02
GDXY5	XY	maternal	TA	European	0.996935	1e-05	0.003035	1e-05	1e-05	427	427	427	427	378	326	3046597534	3046597534	3046597534	3046597534	3045612672	3043731570	427	103550615	3046597534	3117292070	40.77	40.75	40820925	40740111	8405205	5095062	5.08682e+07	4.97146e+07	21	22	73	84	6071	184	2291002643	11491	0	0	322	0	1 + 175 part	26386029	94.933	1.017
GDXX6	XX	paternal	TA	American	0.17648	0.486312	0.013143	0.216415	0.107651	489	489	489	488	429	373	3026884041	3026884041	3026884041	3026876137	3025767991	3023820852	489	133279065	3026884041	3117292070	40.83	40.75	55797919	55562429	6370172	4372201	5.78379e+07	5.61604e+07	18	19	72	87	8977	251	2030023088	9932	0	0	404	4	0 + 245 part	26603968	94.128	1.02
GDXX6	XX	maternal	TA	American	0.17648	0.486312	0.013143	0.216415	0.107651	479	479	479	479	412	376	3026116984	3026116984	3026116984	3026116984	3024812035	3023520107	479	129960376	3026116984	3117292070	40.82	40.75	42403036	42359856	8950336	4974385	5.14024e+07	4.9899e+07	22	23	72	85	8465	245	2129345952	9567	0	0	414	6	0 + 250 part	24883187	94.218	1.019
GDXX7	XX	paternal	TA	European	0.961589	1e-05	0.020216	1e-05	0.018175	431	431	431	430	388	345	3028175542	3028175542	3028175542	3028167022	3027302840	3025775116	431	111266569	3028175542	3117292070	40.83	40.75	36538223	36227882	5805302	3947543	4.41296e+07	4.2868e+07	25	26	90	106	6479	191	2042255046	10676	0	0	348	5	0 + 191 part	29791555	94.44	1.017
GDXX7	XX	maternal	TA	European	0.961589	1e-05	0.020216	1e-05	0.018175	423	423	423	422	371	328	3027149242	3027149242	3027149242	3027143179	3026119392	3024622721	423	125643110	3027149242	3117292070	40.83	40.75	40903190	38083942	6400548	5160901	4.70936e+07	4.57318e+07	23	24	87	101	7891	175	1971372044	9504	0	0	366	2	0 + 176 part	27139403	94.308	1.018
GDXY6	XY	paternal	TA	European	0.630281	0.152452	1e-05	0.120634	0.096624	654	654	654	654	582	484	2939529822	2939529822	2939529822	2939529822	2938059128	2934551510	654	101369380	2939529822	3117292070	40.81	40.75	52350638	46050670	4623638	1539115	5.05589e+07	4.76758e+07	20	22	85	146	7990	323	1881789775	12527	0	0	434	5	0 + 322 part	26328956	90.85	1.026
GDXY6	XY	maternal	TA	European	0.630281	0.152452	1e-05	0.120634	0.096624	585	585	584	583	500	442	3052393149	3052393149	3052388626	3052383513	3050819025	3048828764	585	130182152	3052393149	3117292070	40.78	40.75	50343382	45747881	5486252	3619582	5.32844e+07	5.21751e+07	20	21	79	93	8388	277	1817301921	11598	0	0	524	6	0 + 275 part	23275959	94.627	1.024
GDXX8	XX	paternal	TA	South Asian	0.304596	0.235103	0.042958	0.305712	0.11163	429	429	429	428	370	315	3022757351	3022757351	3022757351	3022751040	3021603197	3019617016	429	118508691	3022757351	3117292070	40.82	40.75	49708333	43839892	8529621	5211694	5.5771e+07	5.40797e+07	20	21	68	81	8132	181	2128293156	9764	0	0	428	5	0 + 175 part	25315352	94.012	1.02
GDXX8	XX	maternal	TA	South Asian	0.304596	0.235103	0.042958	0.305712	0.11163	416	416	416	415	366	314	3034125159	3034125159	3034125159	3034116095	3033083915	3031283895	416	131720828	3034125159	3117292070	40.81	40.75	44440264	43810349	6986008	4539811	57008644	5.54877e+07	19	20	73	87	7134	175	2094907935	9829	0	0	464	4	0 + 169 part	26775160	94.302	1.021
GDXY7	XY	paternal	TA	South Asian	0.30841	0.160193	0.000656	0.485431	0.045311	475	475	475	474	405	344	2914787987	2914787987	2914787987	2914778752	2913437753	2911347174	475	105424090	2914787987	3117292070	40.86	40.75	44256834	39962350	6418719	2162889	4.55422e+07	4.25837e+07	23	25	87	137	5902	179	1919543818	10434	0	0	250	2	0 + 188 part	23970111	90.622	1.021
GDXY7	XY	maternal	TA	South Asian	0.30841	0.160193	0.000656	0.485431	0.045311	464	464	464	464	404	369	3037343259	3037343259	3037343259	3037343259	3036155295	3034952906	464	115124872	3037343259	3117292070	40.84	40.75	40893651	40277377	6097016	4527120	4.95895e+07	4.83177e+07	22	23	86	100	8132	182	1987660502	10042	0	0	404	2	0 + 169 part	27589957	94.477	1.02
GDXY8	XY	paternal	TA	South Asian	0.158019	0.071948	1e-05	0.770013	1e-05	419	419	419	419	372	306	2933156655	2933156655	2933156655	2933156655	2932213911	2930000877	419	115167782	2933156655	3117292070	40.83	40.75	58055014	55011142	8402457	2545987	5.54678e+07	5.21914e+07	18	20	69	104	6715	188	1935536767	12064	0	0	324	0	0 + 176 part	30735677	91.133	1.019
GDXY8	XY	maternal	TA	South Asian	0.158019	0.071948	1e-05	0.770013	1e-05	398	398	398	398	355	270	3045339216	3045339216	3045339216	3045339216	3044475670	3041521310	398	157405855	3045339216	3117292070	40.8	40.75	55496078	53943109	8707104	6667884	6.0974e+07	5.95666e+07	18	19	64	72	7946	164	2052154964	9952	0	0	348	1	0 + 160 part	26462941	94.64	1.021
GDXX9	XX	paternal	TA	South Asian	0.267836	0.321681	1e-05	0.33375	0.076722	561	561	561	559	505	452	3028235022	3028235022	3028235022	3028220845	3027163178	3025216234	561	108194667	3028235022	3117292070	40.8	40.75	25561957	25127954	4362326	2924494	3.37812e+07	3.28161e+07	34	36	128	150	7548	216	1389388635	9287	0	0	276	3	0 + 211 part	27783081	94.205	1.019
GDXX9	XX	maternal	TA	South Asian	0.267836	0.321681	1e-05	0.33375	0.076722	576	576	576	575	525	466	3034351623	3034351623	3034351623	3034343417	3033366421	3031162441	576	105995004	3034351623	3117292070	40.85	40.75	29405770	29175701	3923438	2906965	3.96423e+07	3.85875e+07	28	29	127	149	8031	216	1704216386	9696	0	0	420	4	0 + 228 part	23211300	94.353	1.021
GDXX10	XX	paternal	TA	European	0.452034	0.056208	0.067403	0.379868	0.044488	486	486	486	484	431	368	3009633649	3009633649	3009633649	3009616217	3008582806	3006445919	486	133582238	3009633649	3117292070	40.86	40.75	50153550	46963384	8567433	4922050	5.85063e+07	56485686	19	20	68	83	6256	238	2222211859	8153	0	0	378	2	2 + 225 part	21342898	94.004	1.017
GDXX10	XX	maternal	TA	European	0.452034	0.056208	0.067403	0.379868	0.044488	474	474	473	473	414	375	3020231717	3020231717	3020226792	3020226792	3019066476	3017673257	474	132128006	3020231717	3117292070	40.85	40.75	46336003	44649131	7217320	4614872	4.97788e+07	4.82289e+07	21	22	82	96	6135	226	2022310404	9193	0	0	346	7	1 + 239 part	24855810	94.253	1.017
GDXX11	XX	paternal	TA	South Asian	0.296202	0.175102	1e-05	0.449138	0.079548	502	502	502	500	410	354	3043196532	3043196532	3043196532	3043178740	3041562731	3039546113	502	116412969	3043196532	3117292070	40.81	40.75	49496636	44994003	5787259	4529170	50384909	49187300	20	21	86	99	8302	209	1947245790	10469	0	0	478	2	0 + 181 part	23726530	94.506	1.022
GDXX11	XX	maternal	TA	South Asian	0.296202	0.175102	1e-05	0.449138	0.079548	473	473	473	472	401	352	3031896820	3031896820	3031896820	3031890830	3030599858	3028773114	473	123038169	3031896820	3117292070	40.82	40.75	48376190	47119434	6701598	4738825	5.4684e+07	5.3186e+07	19	20	81	95	6298	186	2054855018	11040	0	0	284	0	0 + 183 part	28196875	94.456	1.019
GDXX12	XX	paternal	TA	South Asian	0.360849	1e-05	0.118218	0.492636	0.028287	341	341	341	339	298	244	3020425530	3020425530	3020425530	3020409981	3019564785	3017664939	341	125125233	3020425530	3117292070	40.85	40.75	51779698	46644207	13508504	8489508	5.41175e+07	5.24358e+07	20	21	61	69	7967	150	2428328339	9660	0	0	428	2	0 + 132 part	29460987	94.134	1.017
GDXX12	XX	maternal	TA	South Asian	0.360849	1e-05	0.118218	0.492636	0.028287	360	360	360	359	304	260	3018030672	3018030672	3018030672	3018022166	3016895181	3015305383	360	131679161	3018030672	3117292070	40.85	40.75	68737675	61160146	11582703	6622868	6.51267e+07	6.30529e+07	16	17	55	65	7335	153	2431672481	10201	0	0	360	1	0 + 148 part	25645490	94.331	1.015
GDXY9	XY	paternal	TA	South Asian	0.28753	0.272972	1e-05	0.319997	0.119491	648	648	647	646	540	439	2927851689	2927851689	2927847393	2927837702	2925896718	2922261528	648	110916256	2927851689	3117292070	40.8	40.75	42542953	41348342	5236671	1638545	5.09062e+07	4.78126e+07	20	22	82	140	8553	317	1800941120	10412	0	0	400	4	0 + 284 part	27342300	90.714	1.023
GDXY9	XY	maternal	TA	South Asian	0.28753	0.272972	1e-05	0.319997	0.119491	664	664	664	662	546	461	3022048018	3022048018	3022048018	3022029605	3019872340	3016592481	664	131842175	3022048018	3117292070	40.79	40.75	51528395	51359428	6505415	3908884	5.42392e+07	52581964	19	20	84	101	5781	330	2025349057	10246	0	0	244	2	1 + 296 part	22690563	94.398	1.017
GDXX13	XX	paternal	TA	South Asian	0.203511	0.352424	0.034397	0.4092	0.000467	490	490	490	489	449	399	3034810478	3034810478	3034810478	3034804848	3033999837	3032203183	490	141478726	3034810478	3117292070	40.82	40.75	35348174	33655582	5899341	4115692	46963676	4.5721e+07	24	26	90	105	7118	221	1867215118	10572	0	0	368	9	0 + 217 part	25986237	94.274	1.021
GDXX13	XX	maternal	TA	South Asian	0.203511	0.352424	0.034397	0.4092	0.000467	499	499	499	499	456	385	3033740089	3033740089	3033740089	3033740089	3032849376	3030321393	499	99340490	3033740089	3117292070	40.82	40.75	43159660	40765130	5870280	3847096	4.68281e+07	45572946	23	24	86	102	6088	223	2046741093	9023	0	0	298	4	0 + 218 part	21513790	94.66	1.019
GDXX14	XX	paternal	TA	African	0.091889	0.156027	0.087152	0.273584	0.391349	502	502	502	502	414	357	3032244922	3032244922	3032244922	3032244922	3030572049	3028456958	502	110922750	3032244922	3117292070	40.84	40.75	47735442	44930068	8166869	4488583	5.17075e+07	5.02968e+07	21	22	72	85	6863	228	1955169775	11079	0	0	362	6	0 + 232 part	28704324	94.359	1.018
GDXX14	XX	maternal	TA	African	0.091889	0.156027	0.087152	0.273584	0.391349	540	540	540	540	440	385	3021869554	3021869554	3021869554	3021869554	3019948120	3018014582	540	105306726	3021869554	3117292070	40.86	40.75	38501106	37340527	5572719	3852849	4.32831e+07	4.19582e+07	26	27	93	112	7547	243	2110898449	9419	0	0	396	9	0 + 259 part	25154844	94.142	1.019
GDXY10	XY	paternal	TA	South Asian	0.179176	0.186508	0.070186	0.496605	0.067525	422	422	421	421	366	298	2906894193	2906894193	2906890286	2906890286	2905812977	2903500365	422	113933161	2906894193	3117292070	40.84	40.75	55417975	49257322	9306396	2063514	5.69473e+07	5.31037e+07	18	20	63	108	5501	182	2300147917	10059	0	0	288	3	1 + 179 part	26983500	90.563	1.017
GDXY10	XY	maternal	TA	South Asian	0.179176	0.186508	0.070186	0.496605	0.067525	408	408	407	407	366	311	3044401871	3044401871	3044397627	3044397627	3043570251	3041633148	408	137059763	3044401871	3117292070	40.81	40.75	58663375	57553844	10243108	6735961	6.28667e+07	6.13968e+07	17	18	60	67	6705	179	2308742918	10242	0	0	288	2	0 + 161 part	25614047	94.858	1.018
GDXY11	XY	paternal	TA	European	0.397621	0.12956	0.023242	0.357453	0.092125	468	468	468	467	411	352	2933978849	2933978849	2933978849	2933969907	2932882579	2930826351	468	132778541	2933978849	3117292070	40.79	40.75	40903551	40099610	6700763	2273187	5.17739e+07	4.87293e+07	21	23	80	123	5838	209	1784701022	9982	0	0	324	5	1 + 199 part	27677975	91.049	1.021
GDXY11	XY	maternal	TA	European	0.397621	0.12956	0.023242	0.357453	0.092125	482	482	482	480	416	369	3042122039	3042122039	3042122039	3042105098	3040862064	3039261102	482	125314943	3042122039	3117292070	40.78	40.75	44342904	43790239	5319052	3709695	5.0564e+07	4.93447e+07	21	22	86	101	7521	219	2110288567	11728	0	0	510	3	0 + 197 part	28703283	94.543	1.02
GDXX15	XX	paternal	TA	European	0.634738	0.053454	0.010581	0.206827	0.0944	499	499	499	499	443	378	3020266756	3020266756	3020266756	3020266756	3019144614	3016909018	499	126977420	3020266756	3117292070	40.85	40.75	40086799	39877744	8641995	4836381	5.39831e+07	5.23029e+07	20	21	79	93	5841	233	2007679733	10297	0	0	244	5	0 + 218 part	24153657	94.344	1.017
GDXX15	XX	maternal	TA	European	0.634738	0.053454	0.010581	0.206827	0.0944	488	488	488	488	422	355	3029492977	3029492977	3029492977	3029492977	3028219918	3025778903	488	113924409	3029492977	3117292070	40.81	40.75	44081298	42405952	6812569	5065512	5.05128e+07	4.90901e+07	21	22	83	96	7027	221	1997231102	10856	0	0	384	4	0 + 205 part	27246220	94.398	1.018
KDXX1	XX	paternal	TA	European	0.648703	1e-05	1e-05	0.297286	0.053991	399	399	399	398	358	295	3042846647	3042846647	3042846647	3042840120	3042026084	3039869192	399	134402197	3042846647	3117292070	40.81	40.75	54683618	54683618	8672641	6364341	5.91337e+07	5.77215e+07	19	19	63	72	9919	166	2318420694	11169	0	0	516	3	1 + 158 part	31304021	94.3	1.022
KDXX1	XX	maternal	TA	European	0.648703	1e-05	1e-05	0.297286	0.053991	422	422	421	420	363	319	3020523807	3020523807	3020521912	3020514191	3019349406	3017837071	421	132855197	3020521912	3117292070	40.82	40.75	43625611	42256439	8394288	4682838	52251790	5.06297e+07	20	22	77	91	6463	192	2054826672	10718	0	0	302	1	0 + 182 part	23096982	94.308	1.017
KDXX2	XX	paternal	TA	European	0.61643	1e-05	1e-05	0.273694	0.109856	346	346	346	346	325	280	3016560071	3016560071	3016560071	3016560071	3016124121	3014591774	346	130976306	3016560071	3117292070	40.85	40.75	49635757	49458799	10953037	5960775	58134705	5.62561e+07	19	20	61	72	4518	142	1917732144	9015	0	0	208	5	0 + 141 part	25787345	94.183	1.017
KDXX2	XX	maternal	TA	European	0.61643	1e-05	1e-05	0.273694	0.109856	327	327	327	327	303	236	3031299330	3031299330	3031299330	3031299330	3030811732	3028494815	327	171674008	3031299330	3117292070	40.83	40.75	55551705	52838092	12326206	8481750	6.68709e+07	6.50263e+07	17	18	56	64	5587	138	2252068560	9695	0	0	368	7	0 + 151 part	28598841	94.654	1.016
GHXY1	XY	paternal	SA	European	0.525099	0.062738	0.024488	0.045519	0.342155	836	836	836	836	800	659	2970635495	2970635495	2970635495	2970635495	2969927747	2964798730	836	108229697	2970635495	3117292070	40.83	40.75	40670287	39490064	3403514	1328338	4.7367e+07	4.51386e+07	21	22	113	176	9669	502	1646288652	11473	0	0	490	24	1 + 500 part	24273565	91.775	1.027
GHXY1	XY	maternal	SA	European	0.525099	0.062738	0.024488	0.045519	0.342155	703	703	703	703	692	629	3043048895	3043048895	3043048895	3043048895	3042835238	3040418609	703	117787481	3043048895	3117292070	40.78	40.75	28812628	28642322	3332241	2198639	3.86111e+07	3.76915e+07	29	30	130	155	8176	376	1561650407	10608	0	0	422	16	3 + 387 part	22283949	94.501	1.023
GHXX1	XX	paternal	SA	African	0.283895	0.064033	0.006912	0.144446	0.500714	501	501	501	501	477	417	3043404596	3043404596	3043404596	3043404596	3042889449	3040655635	501	133139099	3043404596	3117292070	40.81	40.75	39419625	39408838	5150597	3493075	4.54512e+07	4.43739e+07	24	25	99	115	7729	216	1802907976	11303	0	0	434	1	0 + 209 part	27847317	94.225	1.024
GHXX1	XX	maternal	SA	African	0.283895	0.064033	0.006912	0.144446	0.500714	517	517	517	517	512	469	3018971343	3018971343	3018971343	3018971343	3018853290	3017214935	517	131418519	3018971343	3117292070	40.76	40.75	30100554	29508622	3978005	2639602	4.1734e+07	4.04177e+07	27	29	121	147	7755	202	1542255334	10736	0	0	394	0	0 + 207 part	26019159	93.697	1.022
GHXX2	XX	paternal	SA	European	0.415823	0.155511	1e-05	0.370188	0.058468	416	416	415	415	406	345	3018369124	3018369124	3018365868	3018365868	3018184328	3015924087	416	143245662	3018369124	3117292070	40.82	40.75	45355563	45154138	7318971	4043208	5.4945e+07	5.32014e+07	20	21	74	90	6130	183	2147696543	10035	0	0	324	1	0 + 173 part	26479451	94.094	1.018
GHXX2	XX	maternal	SA	European	0.415823	0.155511	1e-05	0.370188	0.058468	350	350	350	350	347	327	3033053372	3033053372	3033053372	3033053372	3033011291	3032187071	350	124487558	3033053372	3117292070	40.82	40.75	53673581	53673581	6857573	3921257	5.39605e+07	5.25024e+07	20	20	78	92	9275	159	2072741420	11027	0	0	436	1	0 + 156 part	26150163	94.146	1.022
GHXX3	XX	paternal	SA	American	0.182525	0.587204	1e-05	0.228009	0.002252	470	470	470	470	446	390	3032242961	3032242961	3032242961	3032242961	3031728319	3029650443	470	144387312	3032242961	3117292070	40.82	40.75	41872075	38111219	7285614	4279440	5.11703e+07	4.97742e+07	21	23	79	93	7240	189	1990989584	11360	0	0	368	0	0 + 176 part	27384194	94.18	1.021
GHXX3	XX	maternal	SA	American	0.182525	0.587204	1e-05	0.228009	0.002252	450	450	450	450	443	409	3040380006	3040380006	3040380006	3040380006	3040251539	3038917975	450	134968503	3040380006	3117292070	40.76	40.75	38098360	35045152	5184297	3755268	4.88759e+07	4.767e+07	22	23	99	115	8295	178	1869783929	11552	0	0	460	2	0 + 182 part	32551893	94.129	1.022
GHXY2	XY	paternal	SA	European	0.54724	0.174084	0.011393	0.18145	0.085833	396	396	396	396	377	337	3023148405	3023148405	3023148405	3023148405	3022766211	3021288277	396	199021319	3023148405	3117292070	40.77	40.75	69518637	61744647	10342309	5557127	7.38532e+07	7.16228e+07	14	15	54	65	6899	226	2370602220	11245	0	0	430	3	1 + 213 part	28358354	94.199	1.018
GHXY2	XY	maternal	SA	European	0.54724	0.174084	0.011393	0.18145	0.085833	379	379	379	379	372	346	2941027946	2941027946	2941027946	2941027946	2940901969	2939897028	379	137724572	2941027946	3117292070	40.84	40.75	55214774	43802119	8149890	2079980	5.80262e+07	5.47452e+07	18	20	69	111	7084	218	2085700849	10716	0	0	296	1	0 + 213 part	25797320	91.623	1.018
GHXX4	XX	paternal	SA	American	0.144677	0.605155	1e-05	0.107754	0.142404	416	416	416	416	402	341	3028411406	3028411406	3028411406	3028411406	3028142709	3025881476	416	141728258	3028411406	3117292070	40.84	40.75	41683536	41438734	7580112	5176912	5.63062e+07	5.47007e+07	20	21	75	87	6543	187	2240385965	9819	0	0	310	2	0 + 174 part	25642773	94.186	1.02
GHXX4	XX	maternal	SA	American	0.144677	0.605155	1e-05	0.107754	0.142404	430	430	430	430	425	396	3032138578	3032138578	3032138578	3032138578	3032041181	3030917879	430	133795886	3032138578	3117292070	40.81	40.75	37981632	36182834	5230374	3706138	5.11656e+07	4.97679e+07	21	22	97	115	8393	180	1812444247	10923	0	0	396	3	0 + 178 part	29146810	93.946	1.023
GHXY5	XY	paternal	SA	South Asian	0.22202	0.072583	0.095929	0.485547	0.123922	457	457	457	457	429	382	2998746947	2998746947	2998746947	2998746947	2998209964	2996495631	457	126467923	2998746947	3117292070	40.82	40.75	44080305	40826309	8688837	3729422	51385426	4.94313e+07	21	22	72	92	5950	242	1716327759	10302	0	0	332	6	0 + 241 part	20609827	93.424	1.02
GHXY5	XY	maternal	SA	South Asian	0.22202	0.072583	0.095929	0.485547	0.123922	415	415	415	415	411	375	2951867613	2951867613	2951867613	2951867613	2951796268	2950457129	415	175450039	2951867613	3117292070	40.81	40.75	52489041	48885454	6153098	2242293	6.13923e+07	5.81344e+07	17	18	77	118	5663	242	2264321650	10150	0	0	342	0	0 + 226 part	23512576	91.961	1.019
GHXY6	XY	paternal	SA	East Asian	0.298155	0.045099	0.496516	0.099186	0.061044	592	592	592	590	554	470	3013666638	3013666638	3013666638	3013648135	3012908155	3009802785	592	135341414	3013666638	3117292070	40.82	40.75	55284396	54750683	6722487	2966732	6.85068e+07	6.62295e+07	15	16	64	85	5713	321	2201409319	8279	0	0	272	4	1 + 280 part	18632711	94.179	1.017
GHXY6	XY	maternal	SA	East Asian	0.298155	0.045099	0.496516	0.099186	0.061044	557	557	557	557	544	477	2991022977	2991022977	2991022977	2991022977	2990751084	2988198634	557	132525502	2991022977	3117292070	40.81	40.75	50458176	49550022	5380580	2229517	5.38118e+07	5.16321e+07	19	20	81	116	6089	292	2192618964	9018	0	0	330	5	0 + 270 part	19800253	93.149	1.02
KHXY1	XY	paternal	SA	EastAsian	0.378147	1e-05	0.461662	0.111139	0.049042	458	458	458	458	422	366	3000454657	3000454657	3000454657	3000454657	2999737780	2997712053	458	111116316	3000454657	3117292070	40.84	40.75	45180456	43479913	6810193	3709188	5.00085e+07	4.81342e+07	21	22	79	100	6820	194	1869900971	9798	0	0	376	4	0 + 179 part	29690495	93.478	1.017
KHXY1	XY	maternal	SA	EastAsian	0.378147	1e-05	0.461662	0.111139	0.049042	386	386	386	386	379	347	2971388452	2971388452	2971388452	2971388452	2971255086	2969926887	386	171605196	2971388452	3117292070	40.82	40.75	50422660	49070197	7720111	3214195	5.78833e+07	5.51741e+07	19	21	68	93	6443	190	2301011905	10521	0	0	316	2	0 + 172 part	27474553	92.407	1.02
KHXX2	XX	paternal	SA	European	0.6121	1e-05	0.00051	0.160765	0.226616	800	800	800	800	765	693	3026849868	3026849868	3026849868	3026849868	3026145382	3023461466	800	114802753	3026849868	3117292070	40.79	40.75	27539368	26647912	2543930	1469467	3.49276e+07	3.39142e+07	32	34	173	215	7107	293	1584285053	10962	0	0	332	5	0 + 296 part	23242501	94.108	1.022
KHXX2	XX	maternal	SA	European	0.6121	1e-05	0.00051	0.160765	0.226616	721	721	721	721	711	660	3008373897	3008373897	3008373897	3008373897	3008166256	3006232897	721	89674271	3008373897	3117292070	40.82	40.75	26120595	25097496	2596466	1476108	3.15082e+07	3.04073e+07	34	36	163	213	6330	263	1251255161	9664	0	0	270	2	0 + 258 part	21077936	93.884	1.018
KHXX4	XX	paternal	SA	European	0.678854	0.009054	1e-05	0.239183	0.072898	454	454	454	454	433	385	3044618896	3044618896	3044618896	3044618896	3044215886	3042394231	454	140358937	3044618896	3117292070	40.8	40.75	52472492	52316035	5785320	4504216	55936793	5.46327e+07	19	20	78	91	8752	203	2104898703	11974	0	0	528	1	0 + 193 part	29924006	94.217	1.024
KHXX4	XX	maternal	SA	European	0.678854	0.009054	1e-05	0.239183	0.072898	525	525	525	525	515	477	3005724880	3005724880	3005724880	3005724880	3005518933	3003994350	525	114910600	3005724880	3117292070	40.86	40.75	34971626	32634365	4542114	2528597	4.45697e+07	4.29746e+07	24	26	107	137	6148	205	1867998629	8776	0	0	350	0	0 + 200 part	19742868	93.959	1.018
KHXX6	XX	paternal	SA	European	0.455156	0.030147	1e-05	0.452951	0.061735	501	501	501	500	483	436	3008123552	3008123552	3008123552	3008118073	3007765710	3006086584	501	109956037	3008123552	3117292070	40.85	40.75	40299262	37083817	5578455	2905944	4.80827e+07	4.63988e+07	22	24	93	118	6764	229	1941315181	8033	0	0	368	6	0 + 213 part	19454396	93.88	1.019
KHXX6	XX	maternal	SA	European	0.455156	0.030147	1e-05	0.452951	0.061735	493	493	493	493	481	445	3033628185	3033628185	3033628185	3033628185	3033391534	3031909291	493	145649777	3033628185	3117292070	40.8	40.75	34629073	33442777	4759803	3217650	4.44586e+07	4.32654e+07	25	26	107	127	7867	182	1561674463	10366	0	0	392	3	1 + 190 part	29613027	94.146	1.021
KHXX7	XX	paternal	SA	European	0.693154	1e-05	1e-05	0.256293	0.050533	601	601	601	601	587	522	2982751731	2982751731	2982751731	2982751731	2982460441	2980024636	601	124620371	2982751731	3117292070	40.74	40.75	49933616	43392506	3947639	1605158	5.26261e+07	5.03548e+07	19	20	102	150	6969	179	1844949861	9626	0	0	292	3	1 + 180 part	23925797	92.982	1.019
KHXX7	XX	maternal	SA	European	0.693154	1e-05	1e-05	0.256293	0.050533	594	594	594	594	588	541	2976027710	2976027710	2976027710	2976027710	2975900941	2974166712	594	101560108	2976027710	3117292070	40.73	40.75	29567283	29402398	3466917	1573809	3.59893e+07	3.43584e+07	30	32	131	187	6802	181	1518448279	9899	0	0	310	1	0 + 186 part	22214513	92.814	1.019
KHXX9	XX	paternal	SA	European	0.614406	0.007515	1e-05	0.207439	0.17063	471	471	471	471	456	410	3032054186	3032054186	3032054186	3032054186	3031740600	3030027214	471	127759135	3032054186	3117292070	40.87	40.75	42612076	42033506	5677383	3902959	51855185	5.04373e+07	21	22	86	102	8290	181	1933110590	9229	0	0	358	1	0 + 176 part	26252025	94.146	1.021
KHXX9	XX	maternal	SA	European	0.614406	0.007515	1e-05	0.207439	0.17063	427	427	427	427	425	384	3031248421	3031248421	3031248421	3031248421	3031204584	3029677789	427	143222420	3031248421	3117292070	40.78	40.75	41965136	41300423	6249481	4472705	51955551	5.05215e+07	21	22	84	99	8721	158	2046557330	9990	0	0	424	1	0 + 155 part	29205161	94.039	1.021
KHXY4	XY	paternal	SA	European	0.510053	1e-05	0.012606	0.265372	0.211959	420	420	420	420	408	358	3038134871	3038134871	3038134871	3038134871	3037885734	3035963748	420	126674777	3038134871	3117292070	40.82	40.75	56821859	56821859	7300146	4452701	5.9137e+07	5.76353e+07	18	18	73	85	7282	176	2296891740	9471	0	0	410	3	1 + 184 part	30302866	94.181	1.022
KHXY4	XY	maternal	SA	European	0.510053	1e-05	0.012606	0.265372	0.211959	368	368	368	368	365	337	2913457507	2913457507	2913457507	2913457507	2913388901	2912283349	368	133420476	2913457507	3117292070	40.88	40.75	43809652	41616414	8347048	2038365	5.44169e+07	5.08587e+07	19	21	72	118	7836	173	1934273322	8540	0	0	384	2	0 + 177 part	27353199	90.493	1.02
KHXY5	XY	paternal	SA	European	0.518525	1e-05	1e-05	0.356462	0.124993	470	470	470	470	454	410	3027654837	3027654837	3027654837	3027654837	3027311463	3025651508	470	126914040	3027654837	3117292070	40.77	40.75	42903713	41287265	5255211	3464170	5.06634e+07	49206542	21	22	88	107	8463	211	1989535786	11788	0	0	490	2	0 + 201 part	26411251	94.009	1.022
KHXY5	XY	maternal	SA	European	0.518525	1e-05	1e-05	0.356462	0.124993	402	402	402	402	400	368	2945677760	2945677760	2945677760	2945677760	2945636757	2944324201	402	182858571	2945677760	3117292070	40.85	40.75	41928646	36469827	5633189	2103185	5.82265e+07	5.5021e+07	18	21	84	131	7982	181	2070213416	10558	0	0	388	1	0 + 172 part	25898659	91.389	1.023
KHXX11	XX	paternal	SA	European	0.600714	0.01081	0.01103	0.200495	0.17695	418	418	418	418	406	372	3019584772	3019584772	3019584772	3019584772	3019318096	3018042011	418	129278164	3019584772	3117292070	40.82	40.75	52274652	49431441	5514402	3447694	5.72737e+07	5.54785e+07	18	19	79	100	7787	182	1651175931	9560	0	0	434	2	0 + 180 part	24178895	94.005	1.02
KHXX11	XX	maternal	SA	European	0.600714	0.01081	0.01103	0.200495	0.17695	396	396	396	396	394	361	3043874846	3043874846	3043874846	3043874846	3043837034	3042526980	396	121313058	3043874846	3117292070	40.77	40.75	40905249	40548503	5676197	4317881	4.20166e+07	4.10271e+07	26	27	98	111	8715	168	1603084482	11322	0	0	428	1	0 + 173 part	30357452	94.311	1.023
KHXX14	XX	paternal	SA	European	0.426952	1e-05	1e-05	0.403927	0.1691	588	588	588	588	563	506	3035437256	3035437256	3035437256	3035437256	3034911565	3032701692	588	138273866	3035437256	3117292070	40.77	40.75	30364582	30019261	3929447	2510451	4.11856e+07	4.01041e+07	28	29	115	139	7937	228	1666918243	10782	0	0	430	7	0 + 226 part	27643784	94.163	1.022
KHXX14	XX	maternal	SA	European	0.426952	1e-05	1e-05	0.403927	0.1691	552	552	552	552	546	507	3007598588	3007598588	3007598588	3007598588	3007485518	3005945384	552	99057649	3007598588	3117292070	40.82	40.75	29558798	28783371	3720079	1966924	3.64813e+07	3.51976e+07	30	32	125	161	6873	227	1646596080	9191	0	0	404	3	0 + 229 part	22062683	93.914	1.018
KHXX15	XX	paternal	SA	European	0.602168	0.017917	1e-05	0.141958	0.237947	506	506	506	506	488	427	3044586474	3044586474	3044586474	3044586474	3044209485	3041953578	506	126573502	3044586474	3117292070	40.83	40.75	53143589	48679646	6473752	4002575	5.57796e+07	5.44786e+07	18	19	81	94	9576	220	2232787563	11178	0	0	506	2	0 + 210 part	29751056	94.269	1.024
KHXX15	XX	maternal	SA	European	0.602168	0.017917	1e-05	0.141958	0.237947	446	446	446	446	443	412	3033673101	3033673101	3033673101	3033673101	3033608679	3032320725	446	139580585	3033673101	3117292070	40.8	40.75	37839378	34814064	4735386	3431565	4.7765e+07	4.64837e+07	23	24	101	120	7821	209	1738532007	10837	0	0	412	0	0 + 208 part	25488055	94.199	1.022
KHXX16	XX	paternal	SA	European	0.580778	1e-05	1e-05	0.347651	0.071551	448	448	448	448	434	388	3030009382	3030009382	3030009382	3030009382	3029704452	3027870701	448	137816057	3030009382	3117292070	40.85	40.75	45441922	41753138	4790772	3132227	50078670	4.86765e+07	22	23	87	107	7830	181	2111514015	9692	0	0	446	3	0 + 183 part	25557439	94.37	1.019
KHXX16	XX	maternal	SA	European	0.580778	1e-05	1e-05	0.347651	0.071551	472	472	472	472	468	444	3010582619	3010582619	3010582619	3010582619	3010494861	3009585810	472	103372919	3010582619	3117292070	40.85	40.75	34715601	34290780	4229258	3119799	4.26729e+07	4.12121e+07	25	27	111	137	6470	188	1736416316	10269	0	0	390	1	0 + 178 part	22566055	94.05	1.017
KHXX17	XX	paternal	SA	European	0.558528	1e-05	1e-05	0.320203	0.121249	458	458	458	458	446	395	3025147280	3025147280	3025147280	3025147280	3024883098	3022947773	458	131157703	3025147280	3117292070	40.8	40.75	36573160	35466065	5061626	3205667	4.36798e+07	4.23886e+07	26	27	94	115	7031	204	1795455441	11230	0	0	472	0	0 + 204 part	27619253	93.948	1.021
KHXX17	XX	maternal	SA	European	0.558528	1e-05	1e-05	0.320203	0.121249	443	443	443	443	437	408	2999467580	2999467580	2999467580	2999467580	2999335056	2998132293	443	138800668	2999467580	3117292070	40.8	40.75	55298360	49451865	4578396	2833321	5.81624e+07	5.59641e+07	18	19	82	113	6749	178	1899176430	9419	0	0	404	1	1 + 185 part	18738303	93.703	1.018
KHXY11	XY	paternal	SA	European	0.568785	0.024276	1e-05	0.372412	0.034518	572	572	572	572	560	500	3012177268	3012177268	3012177268	3012177268	3011931292	3009645347	572	126119433	3012177268	3117292070	40.77	40.75	47080218	46634911	3640521	1943843	4.99662e+07	48281375	21	23	99	136	6914	217	1935057417	9044	0	0	370	1	0 + 211 part	23680706	93.674	1.021
KHXY11	XY	maternal	SA	European	0.568785	0.024276	1e-05	0.372412	0.034518	595	595	595	595	590	557	2926220481	2926220481	2926220481	2926220481	2926122637	2924882869	595	120111980	2926220481	3117292070	40.81	40.75	40945279	35155074	3042481	1043545	4.44244e+07	4.17015e+07	23	26	123	223	6585	225	1631520195	10755	0	0	344	1	0 + 222 part	25835069	90.951	1.02
KHXX18	XX	paternal	SA	European	0.57682	1e-05	1e-05	0.270146	0.153014	560	560	560	560	553	504	3034093262	3034093262	3034093262	3034093262	3033949313	3032199325	560	110951425	3034093262	3117292070	40.8	40.75	35230690	34966116	3389647	2305275	4.31665e+07	42014380	26	27	112	139	6419	258	1892467220	9947	0	0	336	2	0 + 246 part	24722890	94.468	1.019
KHXX18	XX	maternal	SA	European	0.57682	1e-05	1e-05	0.270146	0.153014	584	584	584	584	579	542	3010841841	3010841841	3010841841	3010841841	3010735913	3009237450	584	123943556	3010841841	3117292070	40.83	40.75	29032074	28081640	3273085	2079438	3.81726e+07	36869109	31	33	142	180	6361	253	1799003006	9126	0	0	350	3	0 + 233 part	21567997	94.009	1.018
KHXY12	XY	paternal	SA	European	0.528391	1e-05	1e-05	0.404575	0.067013	440	440	440	439	431	389	3023059399	3023059399	3023059399	3023051968	3022891292	3021328409	440	127887339	3023059399	3117292070	40.81	40.75	48051833	47117850	5885683	3750898	5.45968e+07	52946434	20	21	79	96	6576	206	2230492487	10235	0	0	350	3	1 + 195 part	25136703	94.234	1.018
KHXY12	XY	maternal	SA	European	0.528391	1e-05	1e-05	0.404575	0.067013	480	480	480	480	478	444	2913234505	2913234505	2913234505	2913234505	2913186351	2911828172	480	131451709	2913234505	3117292070	40.83	40.75	36717939	34731885	4232784	1116503	4.52597e+07	4.2297e+07	24	27	103	190	5899	188	1703551274	11009	0	0	332	0	0 + 188 part	25203082	90.836	1.018
KHXY13	XY	paternal	SA	African	0.115923	1e-05	1e-05	0.046421	0.837636	450	450	449	449	438	391	2971114940	2971114940	2971110418	2971110418	2970876769	2969163709	450	140585065	2971114940	3117292070	40.86	40.75	42843249	41151545	4873678	2289403	5.59347e+07	5.33118e+07	19	21	88	126	8689	206	2061499331	11266	0	0	458	2	0 + 209 part	28832577	92.06	1.022
KHXY13	XY	maternal	SA	African	0.115923	1e-05	1e-05	0.046421	0.837636	400	400	400	400	397	383	2993983558	2993983558	2993983558	2993983558	2993920174	2993387603	400	141233610	2993983558	3117292070	40.78	40.75	36368470	34258001	4932594	3155231	5.25214e+07	5.04439e+07	21	23	99	127	7625	183	2041397337	11249	0	0	366	2	0 + 181 part	28602643	92.82	1.022
KHXY14	XY	paternal	SA	European	0.569404	1e-05	1e-05	0.355405	0.075171	485	485	485	485	477	437	2977919458	2977919458	2977919458	2977919458	2977770363	2976318111	485	137937866	2977919458	3117292070	40.81	40.75	37583878	35026006	5024354	2319455	4.72283e+07	4.51168e+07	23	25	97	133	7448	232	1822546458	10160	0	0	468	3	0 + 217 part	26065525	92.601	1.02
KHXY14	XY	maternal	SA	European	0.569404	1e-05	1e-05	0.355405	0.075171	467	467	467	467	463	438	2983645793	2983645793	2983645793	2983645793	2983569352	2982610063	467	131660796	2983645793	3117292070	40.84	40.75	38902785	38346450	4291748	2314540	4.89453e+07	4.68469e+07	22	24	99	137	6260	195	1870422957	9103	0	0	320	3	0 + 199 part	21293712	93.077	1.018
[truncated: 41 more columns]

## Sheet: Supplementary_9
Supplementary Table 9: The assembly characteristics of 114 haplotypes from 57 samples were categorized by sample ID, sex, and type (TA: trio assembly or SA: single assembly). Metrics were generated using QUAST, Yak, and Inspector after scaffolding, polishing, and error correction. The table includes contiguity metrics such as the number of contigs per haplotype, which range from 100 to 335, and N…
sample_ID	Sex	haplotype	Type	main_pop	European	American	EastAsian	SouthAsian	African	# contigs (>= 0 bp)	# contigs (>= 1000 bp)	# contigs (>= 5000 bp)	# contigs (>= 10000 bp)	# contigs (>= 25000 bp)	# contigs (>= 50000 bp)	Total length (>= 0 bp)	Total length (>= 1000 bp)	Total length (>= 5000 bp)	Total length (>= 10000 bp)	Total length (>= 25000 bp)	Total length (>= 50000 bp)	# contigs	Largest contig	Total length	Reference length	GC (%)	Reference GC (%)	N50	NG50	N90	NG90	auN	auNG	L50	LG50	L90	LG90	# misassemblies	# misassembled contigs	Misassembled contigs length	# local misassemblies	# scaffold gap ext. mis.	# scaffold gap loc. mis.	# possible TEs	# unaligned mis. contigs	# unaligned contigs	Unaligned length	Genome fraction (%)	Duplication ratio
GHXX1	XX	paternal	SA	African	0.283895	0.064033	0.006912	0.144446	0.500714	209	209	209	209	188	137	3043145560	3043145560	3043145560	3043145560	3042695694	3040786606	209	246192791	3043145560	3117292070	40.81	40.75	153160304	145310773	78263929	64610525	1.52754e+08	1.49121e+08	8	9	19	20	8447	105	3034135139	11009	2	46	422	0	0 + 87 part	29190097	94.536	1.019
GHXX1	XX	maternal	SA	African	0.283895	0.064033	0.006912	0.144446	0.500714	167	167	167	167	163	132	3018913989	3018913989	3018913989	3018913989	3018827660	3017642997	167	242205510	3018913989	3117292070	40.76	40.75	151507736	145926027	78518203	64007557	151589212	1.46805e+08	8	9	19	20	8111	81	3010176809	10647	8	42	370	0	0 + 63 part	28631281	93.746	1.02
GHXX2	XX	paternal	SA	European	0.415823	0.155511	1e-05	0.370188	0.058468	156	156	156	156	148	99	3018451909	3018451909	3018451909	3018451909	3018286938	3016470241	156	242117145	3018451909	3117292070	40.82	40.75	152767985	145594690	82634311	65287852	152842077	1.47996e+08	8	9	19	20	6137	78	3011338091	10086	1	43	322	0	0 + 59 part	31061679	94.104	1.016
GHXX2	XX	maternal	SA	European	0.415823	0.155511	1e-05	0.370188	0.058468	116	116	116	116	114	99	3032886925	3032886925	3032886925	3032886925	3032857691	3032238195	116	255543599	3032886925	3117292070	40.82	40.75	152140828	145493880	76855357	65903676	1.54033e+08	1.49862e+08	8	9	19	20	9290	76	3026416964	10821	3	28	480	1	0 + 63 part	29287152	94.181	1.02
GHXX3	XX	paternal	SA	American	0.182525	0.587204	1e-05	0.228009	0.002252	196	196	196	196	178	140	3032281736	3032281736	3032281736	3032281736	3031894450	3030465829	196	248733216	3032281736	3117292070	40.82	40.75	153454490	144440751	79731197	64202711	1.525e+08	1.48341e+08	8	9	19	20	7790	94	3023577900	10992	4	40	368	0	0 + 72 part	27939320	94.205	1.02
GHXX3	XX	maternal	SA	American	0.182525	0.587204	1e-05	0.228009	0.002252	158	158	158	158	151	124	3040292895	3040292895	3040292895	3040292895	3040164428	3039100272	158	249582366	3040292895	3117292070	40.76	40.75	152472441	148633245	67994470	59436628	1.47251e+08	1.43614e+08	8	9	20	21	9144	79	3031777566	11054	7	41	470	0	0 + 66 part	33098476	94.109	1.022
GHXX4	XX	paternal	SA	American	0.144677	0.605155	1e-05	0.107754	0.142404	180	180	180	180	167	118	3028246070	3028246070	3028246070	3028246070	3027991944	3026191441	180	246154745	3028246070	3117292070	40.84	40.75	152167558	145982012	78066138	66155125	1.53272e+08	1.48894e+08	8	9	19	20	6387	78	3019836525	9853	3	33	282	2	0 + 68 part	32625199	94.347	1.016
GHXX4	XX	maternal	SA	American	0.144677	0.605155	1e-05	0.107754	0.142404	157	157	157	157	151	127	3031904337	3031904337	3031904337	3031904337	3031790372	3030840430	157	240664105	3031904337	3117292070	40.81	40.75	150759643	144810532	76050645	64411370	1.51459e+08	1.4731e+08	8	9	19	20	8582	82	3019668826	10983	3	35	408	2	0 + 70 part	31371727	93.977	1.022
KHXX10	XX	paternal	SA	European	0.436299	1e-05	1e-05	0.287189	0.276492	121	121	121	121	121	96	3026047242	3026047242	3026047242	3026047242	3026047242	3025059969	121	242738095	3026047242	3117292070	40.82	40.75	152687973	146421561	79027137	63584510	1.5258e+08	1.48114e+08	8	9	19	20	5140	49	3018270157	9797	2	26	252	1	0 + 44 part	27720419	94.46	1.016
KHXX10	XX	maternal	SA	European	0.436299	1e-05	1e-05	0.287189	0.276492	103	103	103	103	102	93	3029254767	3029254767	3029254767	3029254767	3029238198	3028865007	103	247419051	3029254767	3117292070	40.86	40.75	152448160	146471349	80565314	66671058	1.53777e+08	1.49434e+08	8	9	19	20	7624	54	3022807825	10271	2	26	374	1	0 + 45 part	31592611	94.451	1.015
KHXX11	XX	paternal	SA	European	0.600714	0.01081	0.01103	0.200495	0.17695	135	135	135	135	126	102	3019360387	3019360387	3019360387	3019360387	3019160386	3018231115	135	248427090	3019360387	3117292070	40.82	40.75	153688647	144981482	66188183	60538207	151786617	1.47018e+08	8	9	19	20	7906	68	3009883838	9914	4	46	458	0	0 + 65 part	29541975	94.051	1.017
KHXX11	XX	maternal	SA	European	0.600714	0.01081	0.01103	0.200495	0.17695	123	123	123	123	120	99	3043702893	3043702893	3043702893	3043702893	3043648511	3042827573	123	244313032	3043702893	3117292070	40.77	40.75	152497752	145794586	80737902	63962164	1.52823e+08	1.49216e+08	8	9	19	20	8787	67	3036947366	11033	6	38	452	0	0 + 59 part	36908667	94.384	1.02
KHXX14	XX	paternal	SA	European	0.426952	1e-05	1e-05	0.403927	0.1691	165	165	165	165	145	109	3035240514	3035240514	3035240514	3035240514	3034816526	3033427006	165	252500419	3035240514	3117292070	40.77	40.75	150773159	147259345	80461190	64603822	1.53297e+08	1.49262e+08	8	9	19	20	8374	84	3028565224	10912	5	38	434	2	0 + 64 part	29844228	94.176	1.021
KHXX14	XX	maternal	SA	European	0.426952	1e-05	1e-05	0.403927	0.1691	150	150	150	150	144	120	3007550495	3007550495	3007550495	3007550495	3007434922	3006475311	150	241186301	3007550495	3117292070	40.82	40.75	152919347	144331707	78066567	65526364	1.52101e+08	1.46746e+08	8	9	19	20	7344	91	3000742057	9136	5	42	378	0	0 + 78 part	24758564	94.031	1.015
KHXX15	XX	paternal	SA	European	0.602168	0.017917	1e-05	0.141958	0.237947	202	202	202	202	185	136	3044581950	3044581950	3044581950	3044581950	3044225723	3042424811	202	249504255	3044581950	3117292070	40.83	40.75	152547047	146613871	79128619	64492771	152382781	1.48828e+08	8	9	19	20	9550	101	3036155493	11409	3	35	474	0	0 + 84 part	33040037	94.321	1.021
KHXX15	XX	maternal	SA	European	0.602168	0.017917	1e-05	0.141958	0.237947	139	139	139	139	135	115	3033508687	3033508687	3033508687	3033508687	3033427698	3032584352	139	241990208	3033508687	3117292070	40.8	40.75	154599858	144800404	79541471	66247295	1.51821e+08	147740675	8	9	19	20	8156	86	3029216830	10147	3	35	406	0	0 + 78 part	29266835	94.245	1.019
KHXX16	XX	paternal	SA	European	0.580778	1e-05	1e-05	0.347651	0.071551	135	135	135	135	127	97	3029849105	3029849105	3029849105	3029849105	3029678432	3028506469	135	242827007	3029849105	3117292070	40.85	40.75	154943622	145776719	80101354	66692782	1.52555e+08	1.48275e+08	8	9	19	20	8010	71	3023151531	9782	2	34	436	1	0 + 59 part	27972721	94.354	1.018
KHXX16	XX	maternal	SA	European	0.580778	1e-05	1e-05	0.347651	0.071551	128	128	128	128	125	108	3010406546	3010406546	3010406546	3010406546	3010345499	3009735640	128	245105874	3010406546	3117292070	40.85	40.75	152098879	145417317	78331860	64629462	1.52442e+08	1.47215e+08	8	9	19	20	6793	73	3001655849	10486	5	41	428	0	0 + 55 part	27162778	94.064	1.015
KHXX17	XX	paternal	SA	European	0.558528	1e-05	1e-05	0.320203	0.121249	138	138	138	138	129	93	3024827339	3024827339	3024827339	3024827339	3024631220	3023287158	138	241801301	3024827339	3117292070	40.8	40.75	152395619	145560835	77560761	64003698	1.5196e+08	1.47452e+08	8	9	19	20	7341	80	3019213205	11201	7	40	424	0	0 + 62 part	30645533	94.028	1.018
KHXX17	XX	maternal	SA	European	0.558528	1e-05	1e-05	0.320203	0.121249	118	118	118	118	115	102	2999579444	2999579444	2999579444	2999579444	2999516025	2998985685	118	246096430	2999579444	3117292070	40.81	40.75	150697746	145474106	77552024	65704679	1.52645e+08	1.46881e+08	8	9	19	20	7187	73	2992557423	9133	4	35	430	1	1 + 63 part	21552291	93.736	1.016
KHXX18	XX	paternal	SA	European	0.57682	1e-05	1e-05	0.270146	0.153014	171	171	171	171	164	130	3033793309	3033793309	3033793309	3033793309	3033649360	3032450533	171	243352886	3033793309	3117292070	40.8	40.75	153128900	147776792	80914390	64966065	1.51871e+08	1.47803e+08	8	9	19	20	6673	105	3020589269	9999	6	40	298	2	0 + 83 part	27990087	94.482	1.018
KHXX18	XX	maternal	SA	European	0.57682	1e-05	1e-05	0.270146	0.153014	149	149	149	149	144	127	3010518457	3010518457	3010518457	3010518457	3010417252	3009714518	149	245821664	3010518457	3117292070	40.83	40.75	150631342	143697765	77607073	66022935	1.52219e+08	1.47005e+08	8	9	19	20	6049	101	3005556017	9583	8	50	360	1	0 + 77 part	26732080	94.021	1.016
KHXX2	XX	paternal	SA	European	0.6121	1e-05	0.00051	0.160765	0.226616	269	269	269	269	241	193	3026642121	3026642121	3026642121	3026642121	3026065413	3024300343	269	241013758	3026642121	3117292070	40.79	40.75	151550470	143948992	77189440	62879503	1.49943e+08	1.45583e+08	8	9	19	20	7635	129	3014215557	10479	9	57	364	0	0 + 108 part	26901121	94.132	1.02
KHXX2	XX	maternal	SA	European	0.6121	1e-05	0.00051	0.160765	0.226616	206	206	206	206	201	169	3008050434	3008050434	3008050434	3008050434	3007957311	3006714315	206	241240148	3008050434	3117292070	40.82	40.75	151222042	144172028	75664251	60739767	1.49576e+08	1.44334e+08	8	9	19	21	6594	117	2995437244	9403	11	47	300	0	0 + 90 part	24350966	94.003	1.015
KHXX4	XX	paternal	SA	European	0.678854	0.009054	1e-05	0.239183	0.072898	202	202	202	202	185	147	3044503108	3044503108	3044503108	3044503108	3044164802	3042739300	202	242701735	3044503108	3117292070	40.8	40.75	153027676	147069118	77489322	63748500	1.52507e+08	148946228	8	9	19	20	9185	101	3033649582	11516	0	44	500	0	0 + 83 part	31820401	94.246	1.023
KHXX4	XX	maternal	SA	European	0.678854	0.009054	1e-05	0.239183	0.072898	188	188	188	188	178	153	3005693840	3005693840	3005693840	3005693840	3005485450	3004461618	188	245158771	3005693840	3117292070	40.86	40.75	153498381	146014659	77476597	65448474	1.51646e+08	1.46217e+08	8	9	19	20	5966	100	2995110685	8749	3	53	334	0	0 + 94 part	24269569	93.958	1.016
KHXX5	XX	paternal	SA	European	0.614483	1e-05	0.002251	0.266023	0.117233	117	117	117	117	116	94	3028226942	3028226942	3028226942	3028226942	3028206293	3027314488	117	247510778	3028226942	3117292070	40.82	40.75	154872482	145890675	79530400	67477816	1.53493e+08	1.49107e+08	8	9	19	20	6053	64	3020735455	10000	0	18	364	1	0 + 53 part	27285489	94.613	1.015
KHXX5	XX	maternal	SA	European	0.614483	1e-05	0.002251	0.266023	0.117233	103	103	103	103	101	88	3009033025	3009033025	3009033025	3009033025	3009001050	3008505882	103	249012037	3009033025	3117292070	40.85	40.75	149012593	145940689	80596899	66924148	1.5318e+08	1.4786e+08	8	9	19	20	3956	67	3003382070	9863	2	26	182	0	0 + 46 part	28610720	94.288	1.012
KHXX6	XX	paternal	SA	European	0.455156	0.030147	1e-05	0.452951	0.061735	169	169	169	169	155	120	3007888431	3007888431	3007888431	3007888431	3007599660	3006337957	169	241389909	3007888431	3117292070	40.85	40.75	152595204	145934745	79491779	66040428	1.5201e+08	1.46675e+08	8	9	19	20	6958	90	2999391842	8265	3	50	314	2	0 + 83 part	26241421	93.941	1.016
KHXX6	XX	maternal	SA	European	0.455156	0.030147	1e-05	0.452951	0.061735	139	139	139	139	129	106	3033651425	3033651425	3033651425	3033651425	3033459609	3032509693	139	246247846	3033651425	3117292070	40.8	40.75	152921827	144703529	79551446	64600985	1.52548e+08	1.48455e+08	8	9	19	20	8286	75	3025624368	10363	6	44	424	2	0 + 67 part	32952363	94.203	1.019
KHXX7	XX	paternal	SA	European	0.693154	1e-05	1e-05	0.256293	0.050533	176	176	176	176	168	134	2982815574	2982815574	2982815574	2982815574	2982636660	2981399841	176	242030673	2982815574	3117292070	40.74	40.75	152713511	145027548	71986331	55525561	1.49392e+08	1.42947e+08	8	9	19	21	7521	83	2957795956	9228	4	48	322	1	1 + 72 part	25453366	92.971	1.018
KHXX7	XX	maternal	SA	European	0.693154	1e-05	1e-05	0.256293	0.050533	119	119	119	119	116	100	2976111617	2976111617	2976111617	2976111617	2976058913	2975448724	119	241733620	2976111617	3117292070	40.73	40.75	151871317	134684002	77510829	56449642	1.50065e+08	1.43269e+08	8	9	19	21	7359	71	2958767568	10016	5	35	308	0	0 + 60 part	26601467	92.877	1.016
KHXX8	XX	paternal	SA	European	0.709955	1e-05	1e-05	0.20672	0.083306	100	100	100	100	99	82	3007845098	3007845098	3007845098	3007845098	3007820617	3007144728	100	242049711	3007845098	3117292070	40.87	40.75	153252763	145823969	80566446	64344207	1.52629e+08	1.4727e+08	8	9	19	20	5264	55	3003292338	8697	1	21	210	0	0 + 45 part	27767680	94.024	1.015
KHXX8	XX	maternal	SA	European	0.709955	1e-05	1e-05	0.20672	0.083306	103	103	103	103	102	88	3021432637	3021432637	3021432637	3021432637	3021416068	3020794091	103	240403794	3021432637	3117292070	40.83	40.75	152061376	146482540	78933335	66548211	152523900	1.47834e+08	8	9	19	20	5973	58	3015294306	10151	4	35	370	0	0 + 50 part	32978212	94.165	1.015
KHXX9	XX	paternal	SA	European	0.614406	0.007515	1e-05	0.207439	0.17063	172	172	172	172	160	120	3031945948	3031945948	3031945948	3031945948	3031685797	3030205545	172	241971023	3031945948	3117292070	40.87	40.75	151573042	145988781	79348859	66869236	1.52441e+08	1.48267e+08	8	9	19	20	8307	74	3022488605	9766	3	35	348	1	0 + 66 part	29529933	94.59	1.016
KHXX9	XX	maternal	SA	European	0.614406	0.007515	1e-05	0.207439	0.17063	149	149	149	149	146	112	3031252320	3031252320	3031252320	3031252320	3031191906	3029914266	149	247205416	3031252320	3117292070	40.78	40.75	154185474	146184806	79496819	63206688	1.5363e+08	1.4939e+08	8	9	19	20	9013	63	3022511742	10316	6	32	416	0	0 + 54 part	30839305	94.098	1.02
GDXX1	XX	paternal	TA	European	0.696203	0.070176	0.027016	0.039869	0.166736	200	200	200	200	150	90	3032643272	3032643272	3032643272	3032643272	3031630735	3029479174	200	242304932	3032643272	3117292070	40.83	40.75	152468603	145344949	77204515	65158208	1.52778e+08	1.4863e+08	8	9	19	20	7534	93	3025891404	9481	3	27	394	0	1 + 63 part	30712190	94.458	1.017
GDXX1	XX	maternal	TA	European	0.696203	0.070176	0.027016	0.039869	0.166736	180	180	180	180	129	82	3028019269	3028019269	3028019269	3028019269	3026955327	3025438943	180	242949725	3028019269	3117292070	40.83	40.75	152917180	145555891	80238319	66747400	1.53594e+08	1.49195e+08	8	9	19	20	8501	72	3020661658	10049	0	17	378	2	0 + 57 part	30034218	94.275	1.018
GDXX10	XX	paternal	TA	European	0.452034	0.056208	0.067403	0.379868	0.044488	221	221	221	221	178	130	3009396283	3009396283	3009396283	3009396283	3008569876	3006959327	221	244452718	3009396283	3117292070	40.86	40.75	153645461	146401031	78312506	65289880	1.52689e+08	1.47404e+08	8	9	19	20	6734	95	2998902982	7638	3	37	342	1	1 + 76 part	23034727	94.054	1.015
GDXX10	XX	maternal	TA	European	0.452034	0.056208	0.067403	0.379868	0.044488	210	210	210	210	159	130	3019965872	3019965872	3019965872	3019965872	3018965114	3017925536	210	241742404	3019965872	3117292070	40.85	40.75	154053148	145460828	80011807	66663506	1.519e+08	1.47158e+08	8	9	19	20	5654	91	3010382126	9418	2	35	328	3	0 + 86 part	33717479	94.267	1.014
GDXX11	XX	paternal	TA	South Asian	0.296202	0.175102	1e-05	0.449138	0.079548	261	261	261	261	182	140	3042957855	3042957855	3042957855	3042957855	3041515197	3040021091	261	243570988	3042957855	3117292070	40.81	40.75	152217312	145463538	79273141	63407498	1.52871e+08	1.49225e+08	8	9	19	20	8487	106	3031762941	10463	2	41	474	1	0 + 79 part	26947787	94.604	1.02
GDXX11	XX	maternal	TA	South Asian	0.296202	0.175102	1e-05	0.449138	0.079548	250	250	250	250	186	143	3031786920	3031786920	3031786920	3031786920	3030615188	3028996632	250	246601179	3031786920	3117292070	40.82	40.75	152197602	144822857	76909575	66287380	1.52404e+08	1.48223e+08	8	9	19	20	6532	94	3019557074	10493	3	44	288	0	0 + 78 part	31409819	94.453	1.017
GDXX12	XX	paternal	TA	South Asian	0.360849	1e-05	0.118218	0.492636	0.028287	173	173	173	173	137	96	3020078394	3020078394	3020078394	3020078394	3019342396	3017938977	173	246930574	3020078394	3117292070	40.85	40.75	152722567	145415304	79387154	64806105	1.53601e+08	1.48811e+08	8	9	19	20	7932	72	3008154244	10139	2	35	406	2	0 + 59 part	32379143	94.223	1.015
GDXX12	XX	maternal	TA	South Asian	0.360849	1e-05	0.118218	0.492636	0.028287	186	186	186	186	141	103	3017932509	3017932509	3017932509	3017932509	3017033002	3015664246	186	246030798	3017932509	3117292070	40.85	40.75	150091751	145971354	77561245	66035094	153103109	1.48223e+08	8	9	19	20	6981	73	3007105986	10487	2	28	320	1	0 + 65 part	29800241	94.45	1.013
GDXX13	XX	paternal	TA	South Asian	0.203511	0.352424	0.034397	0.4092	0.000467	201	201	201	201	167	127	3034715169	3034715169	3034715169	3034715169	3034031444	3032581190	201	243283366	3034715169	3117292070	40.82	40.75	153634044	145535206	79487662	65603724	1.52634e+08	1.48591e+08	8	9	19	20	7331	94	3023357463	10849	7	60	350	6	0 + 86 part	29319273	94.374	1.019
GDXX13	XX	maternal	TA	South Asian	0.203511	0.352424	0.034397	0.4092	0.000467	222	222	222	222	186	127	3033558742	3033558742	3033558742	3033558742	3032818983	3030714285	222	242298074	3033558742	3117292070	40.82	40.75	152412450	145628247	79335103	65059888	1.50282e+08	1.46245e+08	8	9	19	20	6737	94	3004320962	8568	4	46	304	0	0 + 82 part	24865418	94.601	1.018
GDXX14	XX	paternal	TA	African	0.091889	0.156027	0.087152	0.273584	0.391349	269	269	269	269	188	140	3032078198	3032078198	3032078198	3032078198	3030551441	3028774214	269	240847562	3032078198	3117292070	40.84	40.75	152722649	144852019	78937052	65479690	1.50628e+08	1.46511e+08	8	9	19	20	6559	116	3024173179	10952	1	32	342	5	0 + 104 part	32412085	94.344	1.017
GDXX14	XX	maternal	TA	African	0.091889	0.156027	0.087152	0.273584	0.391349	260	260	260	260	172	121	3021607708	3021607708	3021607708	3021607708	3019937648	3018187435	260	241591080	3021607708	3117292070	40.86	40.75	154729370	145740858	76276607	65583959	1.51723e+08	1.47066e+08	8	9	19	20	7258	101	3012508299	9856	3	35	356	5	0 + 87 part	31403124	94.163	1.016
GDXX15	XX	paternal	TA	European	0.634738	0.053454	0.010581	0.206827	0.0944	219	219	219	219	171	112	3020022499	3020022499	3020022499	3020022499	3019054910	3017049534	219	245019953	3020022499	3117292070	40.85	40.75	152711850	146382060	79250544	63887633	1.53342e+08	1.48557e+08	8	9	19	20	6140	92	3010743391	10145	3	41	338	0	0 + 74 part	27597704	94.428	1.015
GDXX15	XX	maternal	TA	European	0.634738	0.053454	0.010581	0.206827	0.0944	213	213	213	213	157	98	3029257083	3029257083	3029257083	3029257083	3028180051	3026074536	213	242456403	3029257083	3117292070	40.81	40.75	151589955	144601673	79134001	68779758	1.53063e+08	1.48741e+08	8	9	19	20	7371	91	3019040504	10856	7	38	370	1	0 + 73 part	30310422	94.463	1.016
GDXX2	XX	paternal	TA	European	0.371697	0.165377	1e-05	0.329859	0.133058	166	166	166	166	122	83	3023448470	3023448470	3023448470	3023448470	3022532685	3021261461	166	241832792	3023448470	3117292070	40.83	40.75	152078608	146140964	77344891	65365530	1.53861e+08	1.49229e+08	8	9	19	20	6842	58	3014329096	9891	3	28	374	1	0 + 45 part	33597413	94.357	1.014
GDXX2	XX	maternal	TA	European	0.371697	0.165377	1e-05	0.329859	0.133058	182	182	182	182	140	94	3022079353	3022079353	3022079353	3022079353	3021256986	3019697546	182	240982014	3022079353	3117292070	40.85	40.75	152160030	143803479	79123208	65010313	1.51268e+08	146647511	8	9	19	20	5253	75	3005526424	10365	2	34	288	0	0 + 58 part	31487290	94.272	1.016
GDXX3	XX	paternal	TA	South Asian	0.281613	0.267963	0.001565	0.348099	0.10076	250	250	250	250	193	137	3027300638	3027300638	3027300638	3027300638	3026240413	3024164546	250	242600388	3027300638	3117292070	40.83	40.75	149861977	144710532	80493196	65432119	1.51524e+08	1.4715e+08	8	9	19	20	6796	101	3016799913	10413	4	51	362	0	0 + 90 part	31643104	94.307	1.017
GDXX3	XX	maternal	TA	South Asian	0.281613	0.267963	0.001565	0.348099	0.10076	223	223	223	223	157	128	3025034215	3025034215	3025034215	3025034215	3023829377	3022745699	223	243297339	3025034215	3117292070	40.84	40.75	153126684	146782136	79335808	65816870	1.53043e+08	1.48514e+08	8	9	19	20	8215	88	3015797311	9102	2	47	464	0	0 + 70 part	25357175	94.181	1.019
GDXX4	XX	paternal	TA	European	0.486472	0.219555	0.001507	0.242582	0.049883	240	240	240	240	183	121	3035023955	3035023955	3035023955	3035023955	3033907370	3031725810	240	241808217	3035023955	3117292070	40.84	40.75	154872852	146038679	78849057	66440136	152704609	1.48675e+08	8	9	19	20	6659	91	3024662570	9579	2	35	344	2	0 + 79 part	28701609	94.7	1.016
GDXX4	XX	maternal	TA	European	0.486472	0.219555	0.001507	0.242582	0.049883	240	240	240	240	186	124	3026820129	3026820129	3026820129	3026820129	3025763882	3023569410	240	244793560	3026820129	3117292070	40.86	40.75	152548019	145619673	78908254	65632802	1.52336e+08	1.47915e+08	8	9	19	20	7151	102	3016540520	10562	2	30	354	3	0 + 74 part	29504017	94.254	1.017
GDXX5	XX	paternal	TA	African	0.225892	0.146541	0.009152	0.185776	0.432639	193	193	193	193	132	92	3019910364	3019910364	3019910364	3019910364	3018736960	3017297401	193	246448993	3019910364	3117292070	40.85	40.75	154080761	144752688	77799800	64244304	1.53315e+08	148525227	8	9	19	20	6604	78	3013084933	9832	1	29	342	0	0 + 65 part	30674579	94.094	1.017
GDXX5	XX	maternal	TA	African	0.225892	0.146541	0.009152	0.185776	0.432639	205	205	205	205	141	103	3024712652	3024712652	3024712652	3024712652	3023452707	3022045894	205	242102941	3024712652	3117292070	40.85	40.75	141090992	141090992	80656915	65826003	146118468	1.41779e+08	9	9	20	21	5919	83	3016949300	10011	1	31	240	0	0 + 67 part	29904534	94.487	1.014
GDXX6	XX	paternal	TA	American	0.17648	0.486312	0.013143	0.216415	0.107651	252	252	252	252	200	154	3026607820	3026607820	3026607820	3026607820	3025635608	3024047000	252	241660681	3026607820	3117292070	40.83	40.75	151972477	145984033	80926857	64034853	1.519e+08	1.47481e+08	8	9	19	20	8836	117	3015760759	10025	3	37	364	1	0 + 107 part	33378020	94.22	1.017
GDXX6	XX	maternal	TA	American	0.17648	0.486312	0.013143	0.216415	0.107651	242	242	242	242	187	154	3026046321	3026046321	3026046321	3026046321	3024978719	3023806057	242	242320255	3026046321	3117292070	40.82	40.75	151928179	143990270	80332822	69620247	1.51526e+08	1.47091e+08	8	9	19	20	7949	121	3015473609	10095	7	34	372	2	0 + 103 part	32735918	94.291	1.016
GDXX7	XX	paternal	TA	European	0.961589	1e-05	0.020216	1e-05	0.018175	182	182	182	182	144	109	3027991573	3027991573	3027991573	3027991573	3027206910	3025955961	182	242403983	3027991573	3117292070	40.83	40.75	152391061	144965574	79258184	65964162	1.5262e+08	1.48248e+08	8	9	19	20	6635	78	3016631845	10539	3	38	338	3	0 + 69 part	33451869	94.469	1.015
GDXX7	XX	maternal	TA	European	0.961589	1e-05	0.020216	1e-05	0.018175	191	191	191	191	143	104	3026995517	3026995517	3026995517	3026995517	3026034213	3024685885	191	244495313	3026995517	3117292070	40.83	40.75	153140165	146458995	78985180	65009725	153201967	1.48764e+08	8	9	19	20	7351	86	3020012928	9771	5	32	276	0	0 + 75 part	35769988	94.303	1.015
GDXX8	XX	paternal	TA	South Asian	0.304596	0.235103	0.042958	0.305712	0.11163	201	201	201	201	155	108	3022747056	3022747056	3022747056	3022747056	3021830335	3020152558	201	241124737	3022747056	3117292070	40.82	40.75	152534689	145438656	79474651	65331018	1.52166e+08	1.47551e+08	8	9	19	20	8551	87	3015314393	9791	3	39	442	4	0 + 68 part	27956037	94.054	1.019
GDXX8	XX	maternal	TA	South Asian	0.304596	0.235103	0.042958	0.305712	0.11163	192	192	192	192	150	112	3033878639	3033878639	3033878639	3033878639	3032998341	3031682513	192	247899581	3033878639	3117292070	40.81	40.75	153260143	145654792	79326663	67311993	1.5263e+08	1.48545e+08	8	9	19	20	7819	86	3025788599	9532	1	41	384	2	0 + 63 part	29446183	94.299	1.019
GDXX9	XX	paternal	TA	South Asian	0.267836	0.321681	1e-05	0.33375	0.076722	215	215	215	215	168	125	3028078341	3028078341	3028078341	3028078341	3027142245	3025566349	215	245143241	3028078341	3117292070	40.8	40.75	150373611	145714073	79085513	65050772	1.53062e+08	1.48681e+08	8	9	19	20	8578	100	3019565371	9768	6	54	354	1	0 + 75 part	33812075	94.307	1.016
GDXX9	XX	maternal	TA	South Asian	0.267836	0.321681	1e-05	0.33375	0.076722	218	218	218	218	175	128	3034170500	3034170500	3034170500	3034170500	3033326242	3031596328	218	241605225	3034170500	3117292070	40.85	40.75	153640484	144936658	79216260	65034653	1.49031e+08	1.45057e+08	8	9	19	20	8294	94	3007942705	9889	6	57	298	2	0 + 78 part	26778246	94.391	1.02
KDXX1	XX	paternal	TA	European	0.648703	1e-05	1e-05	0.297286	0.053991	221	221	221	221	183	128	3042619373	3042619373	3042619373	3042619373	3041853235	3039983695	221	249541165	3042619373	3117292070	40.81	40.75	153305157	145366166	80283151	64948635	1.52758e+08	1.49099e+08	8	9	19	20	9665	82	3028603150	11886	5	31	524	0	1 + 68 part	36729553	94.34	1.019
KDXX1	XX	maternal	TA	European	0.648703	1e-05	1e-05	0.297286	0.053991	193	193	193	193	141	107	3020383995	3020383995	3020383995	3020383995	3019321040	3018140230	193	241407601	3020383995	3117292070	40.82	40.75	152873804	135479935	69024038	64932587	1.48942e+08	1.44311e+08	8	9	20	21	6753	94	3011215151	10462	2	36	272	1	0 + 72 part	25725561	94.34	1.015
KDXX2	XX	paternal	TA	European	0.61643	1e-05	1e-05	0.273694	0.109856	153	153	153	153	136	103	3016347500	3016347500	3016347500	3016347500	3015992082	3014867822	153	243510788	3016347500	3117292070	40.85	40.75	150942187	149990542	80863995	63313053	1.53824e+08	1.48843e+08	8	9	19	20	4756	64	3006015281	9214	2	29	206	2	0 + 54 part	28764518	94.195	1.016
KDXX2	XX	maternal	TA	European	0.61643	1e-05	1e-05	0.273694	0.109856	168	168	168	168	145	85	3031225326	3031225326	3031225326	3031225326	3030760934	3028701377	168	246805956	3031225326	3117292070	40.83	40.75	153110843	144811436	82169262	66822027	1.53542e+08	1.49303e+08	8	9	19	20	5686	59	3017493960	9724	3	30	322	6	0 + 59 part	31310052	94.621	1.015
GHXY1	XY	paternal	SA	European	0.525099	0.062738	0.024488	0.045519	0.342155	323	323	323	323	301	229	2969881763	2969881763	2969881763	2969881763	2969454897	2966914936	323	242420774	2969881763	3117292070	40.83	40.75	145619366	135445781	66827831	43281714	1.48122e+08	1.41118e+08	8	9	19	22	9265	217	2959524754	11659	7	55	450	7	1 + 193 part	31266187	91.839	1.023
GHXY1	XY	maternal	SA	European	0.525099	0.062738	0.024488	0.045519	0.342155	237	237	237	237	232	192	3042487424	3042487424	3042487424	3042487424	3042394376	3040829361	237	240727588	3042487424	3117292070	40.78	40.75	145589434	143816185	80464976	65316540	1.49655e+08	1.46064e+08	8	9	19	20	8430	160	3033748038	10434	5	57	396	7	1 + 144 part	27492049	94.504	1.021
GHXY2	XY	paternal	SA	European	0.54724	0.174084	0.011393	0.18145	0.085833	132	132	132	132	126	108	2940659721	2940659721	2940659721	2940659721	2940554698	2939836680	132	242766445	2940659721	3117292070	40.84	40.75	145880977	135458757	63599368	41593473	1.49682e+08	1.41201e+08	8	9	19	22	7237	82	2931532102	10630	3	22	272	1	0 + 73 part	28335773	91.647	1.017
GHXY2	XY	maternal	SA	European	0.54724	0.174084	0.011393	0.18145	0.085833	164	164	164	164	148	123	3022941519	3022941519	3022941519	3022941519	3022619592	3021697252	164	241019301	3022941519	3117292070	40.77	40.75	146410402	136358172	80238270	63760472	1.49427e+08	144904268	8	9	19	21	7049	93	3015861898	11371	5	33	422	2	1 + 77 part	33657160	94.151	1.016
GHXY5	XY	paternal	SA	South Asian	0.22202	0.072583	0.095929	0.485547	0.123922	169	169	169	169	165	141	2951740982	2951740982	2951740982	2951740982	2951669637	2950783064	169	247665022	2951740982	3117292070	40.81	40.75	145393974	135004413	67132298	40930532	1.49512e+08	1.41572e+08	8	9	19	22	5171	106	2943624278	10546	5	36	298	0	0 + 82 part	29757894	91.99	1.016
GHXY5	XY	maternal	SA	South Asian	0.22202	0.072583	0.095929	0.485547	0.123922	185	185	185	185	167	130	2998511499	2998511499	2998511499	2998511499	2998158482	2996781254	185	243073806	2998511499	3117292070	40.82	40.75	146852450	134687338	79919111	60604767	1.50886e+08	1.45137e+08	8	9	19	21	5958	82	2986639219	10673	3	37	314	1	0 + 77 part	24691373	93.466	1.018
GHXY6	XY	paternal	SA	East Asian	0.298155	0.045099	0.496516	0.099186	0.061044	266	266	266	266	234	177	3013309292	3013309292	3013309292	3013309292	3012654806	3010551069	266	240800311	3013309292	3117292070	40.82	40.75	147325698	135331420	78369029	63787285	1.49127e+08	1.44152e+08	8	9	19	21	6133	127	2999973400	7775	8	53	274	1	1 + 94 part	21958220	94.094	1.017
GHXY6	XY	maternal	SA	East Asian	0.298155	0.045099	0.496516	0.099186	0.061044	205	205	205	205	196	157	2990863856	2990863856	2990863856	2990863856	2990679303	2989153210	205	247448556	2990863856	3117292070	40.81	40.75	144417441	135496999	80768325	60792437	149600927	1.43534e+08	8	9	19	21	6084	106	2978205299	8854	4	46	340	1	0 + 84 part	25500016	93.204	1.017
KHXY1	XY	paternal	SA	EastAsian	0.378147	1e-05	0.461662	0.111139	0.049042	179	179	179	179	173	146	2971312514	2971312514	2971312514	2971312514	2971203811	2970087229	179	252268023	2971312514	3117292070	40.82	40.75	146027422	135307014	64264017	55576926	1.50623e+08	143569779	8	9	19	21	6518	89	2958816334	10482	7	31	282	0	0 + 71 part	32229207	92.457	1.017
KHXY1	XY	maternal	SA	EastAsian	0.378147	1e-05	0.461662	0.111139	0.049042	206	206	206	206	176	133	3000352706	3000352706	3000352706	3000352706	2999753258	2998194062	206	241196902	3000352706	3117292070	40.84	40.75	145336497	136693038	78255531	62336702	1.48047e+08	1.42494e+08	8	9	19	21	7593	88	2983965139	9197	6	36	418	2	0 + 68 part	31305703	93.464	1.017
KHXY11	XY	paternal	SA	European	0.568785	0.024276	1e-05	0.372412	0.034518	149	149	149	149	145	131	2926090351	2926090351	2926090351	2926090351	2926016842	2925499208	149	243266504	2926090351	3117292070	40.81	40.75	140927073	133955837	66502386	37403172	1.49401e+08	1.40237e+08	8	9	19	22	6934	89	2919498809	10752	8	38	364	0	0 + 74 part	29392934	90.97	1.018
KHXY11	XY	maternal	SA	European	0.568785	0.024276	1e-05	0.372412	0.034518	181	181	181	181	172	146	3012097491	3012097491	3012097491	3012097491	3011917655	3010904565	181	240528812	3012097491	3117292070	40.77	40.75	146850266	136306235	76054004	59864570	1.48872e+08	143848121	8	9	19	21	7399	99	3000295499	8766	5	37	350	0	0 + 85 part	25208729	93.727	1.02
KHXY12	XY	paternal	SA	European	0.528391	1e-05	1e-05	0.404575	0.067013	139	139	139	139	137	116	2913000088	2913000088	2913000088	2913000088	2912959247	2912111177	139	244988786	2913000088	3117292070	40.83	40.75	146010944	134740427	78569708	40051972	1.51184e+08	1.41276e+08	8	9	18	22	5683	68	2901201122	11182	7	32	300	1	0 + 61 part	29039919	90.854	1.016
KHXY12	XY	maternal	SA	European	0.528391	1e-05	1e-05	0.404575	0.067013	151	151	151	151	144	116	3023089502	3023089502	3023089502	3023089502	3022950712	3021902535	151	242649057	3023089502	3117292070	40.81	40.75	146092086	135248789	80296492	65063409	1.50277e+08	1.45735e+08	8	9	19	20	6930	79	3015340679	9695	8	35	332	2	1 + 66 part	29520594	94.239	1.016
KHXY13	XY	paternal	SA	African	0.115923	1e-05	1e-05	0.046421	0.837636	166	166	166	166	159	120	2971002072	2971002072	2971002072	2971002072	2970842654	2969453610	166	246193653	2971002072	3117292070	40.86	40.75	146582278	141317128	65671135	61077424	1.50726e+08	143652976	8	9	19	21	9126	84	2962145931	11012	3	35	438	0	0 + 66 part	31668897	92.012	1.021
KHXY13	XY	maternal	SA	African	0.115923	1e-05	1e-05	0.046421	0.837636	111	111	111	111	109	101	2993751217	2993751217	2993751217	2993751217	2993712947	2993394984	111	241442556	2993751217	3117292070	40.78	40.75	144105368	135475719	78572754	63047629	148828199	1.4293e+08	8	9	19	21	8320	66	2988039211	10855	5	35	354	0	0 + 57 part	30489200	92.885	1.02
KHXY14	XY	paternal	SA	European	0.569404	1e-05	1e-05	0.355405	0.075171	158	158	158	158	153	124	2977882798	2977882798	2977882798	2977882798	2977781863	2976708437	158	242016268	2977882798	3117292070	40.81	40.75	145125170	135213257	69114847	61973319	1.49169e+08	1.42498e+08	8	9	19	21	7548	92	2970392945	10596	6	54	374	1	0 + 73 part	30743749	92.639	1.018
KHXY14	XY	maternal	SA	European	0.569404	1e-05	1e-05	0.355405	0.075171	129	129	129	129	125	106	2983629797	2983629797	2983629797	2983629797	2983553357	2982837681	129	242558586	2983629797	3117292070	40.84	40.75	147384805	135636655	77396423	61125954	1.49891e+08	143463601	8	9	19	21	6451	77	2977735320	9022	6	43	354	0	0 + 65 part	23979590	93.078	1.017
KHXY4	XY	paternal	SA	European	0.510053	1e-05	0.012606	0.265372	0.211959	140	140	140	140	137	115	2913436796	2913436796	2913436796	2913436796	2913374270	2912492835	140	242676473	2913436796	3117292070	40.88	40.75	147159360	134661936	79658922	35923475	1.50757e+08	1.40898e+08	8	9	18	22	8012	76	2903898520	9275	7	28	388	0	0 + 70 part	31499970	90.513	1.019
KHXY4	XY	maternal	SA	European	0.510053	1e-05	0.012606	0.265372	0.211959	198	198	198	198	186	152	3037905070	3037905070	3037905070	3037905070	3037655932	3036315638	198	242258068	3037905070	3117292070	40.82	40.75	145040226	135856715	79944888	63255028	1.49972e+08	1.46153e+08	8	9	19	20	8131	86	3025094189	9783	2	30	410	1	1 + 75 part	32224617	94.223	1.021
KHXY5	XY	paternal	SA	European	0.518525	1e-05	1e-05	0.356462	0.124993	186	186	186	186	173	139	3027500276	3027500276	3027500276	3027500276	3027214743	3025947127	186	241754928	3027500276	3117292070	40.77	40.75	145560899	137192282	77933781	61981460	1.49485e+08	1.45179e+08	8	9	19	21	8619	86	3012684940	11611	2	37	452	0	0 + 69 part	32365951	93.963	1.02
KHXY5	XY	maternal	SA	European	0.518525	1e-05	1e-05	0.356462	0.124993	138	138	138	138	137	115	2945154348	2945154348	2945154348	2945154348	2945137778	2944241739	138	250854888	2945154348	3117292070	40.85	40.75	146747289	135713120	66824354	45392519	1.49469e+08	1.41215e+08	8	9	19	22	8093	77	2915019704	10752	3	33	364	1	0 + 58 part	29884015	91.426	1.02
KHXY8	XY	paternal	SA	European	0.556374	1e-05	1e-05	0.38432	0.059286	124	124	124	124	124	106	2969465938	2969465938	2969465938	2969465938	2969465938	2968827417	124	242543505	2969465938	3117292070	40.79	40.75	146128209	138671148	80648877	59137472	1.48882e+08	1.41821e+08	8	9	19	21	6176	70	2961024521	10224	2	25	264	1	0 + 58 part	34619578	92.348	1.017
KHXY8	XY	maternal	SA	European	0.556374	1e-05	1e-05	0.38432	0.059286	115	115	115	115	114	101	2952969471	2952969471	2952969471	2952969471	2952952901	2952451307	115	249102678	2952969471	3117292070	40.82	40.75	144865663	140459404	64065320	52331923	1.49705e+08	1.41814e+08	8	9	19	22	7392	73	2947829625	10628	3	34	392	0	0 + 60 part	33323443	91.706	1.019
GDXY1	XY	paternal	TA	European	0.86357	0.098971	0.008648	1e-05	0.028801	295	295	295	295	226	182	2930040894	2930040894	2930040894	2930040894	2928706446	2927201667	295	244853398	2930040894	3117292070	40.84	40.75	147919756	134630533	65939729	44415633	149574100	1.40589e+08	8	9	19	22	5656	136	2914869100	11640	7	43	228	4	0 + 116 part	31762991	91.306	1.017
GDXY1	XY	maternal	TA	European	0.86357	0.098971	0.008648	1e-05	0.028801	304	304	304	304	244	182	3053405660	3053405660	3053405660	3053405660	3052219146	3049857355	304	243856975	3053405660	3117292070	40.8	40.75	152243760	145889485	79939173	65189221	1.5086e+08	147768019	8	9	19	20	8219	126	3033799693	10427	2	33	394	11	0 + 117 part	36151476	94.687	1.02
GDXY10	XY	paternal	TA	South Asian	0.179176	0.186508	0.070186	0.496605	0.067525	221	221	221	221	177	121	2906748500	2906748500	2906748500	2906748500	2905877224	2903988103	221	241213495	2906748500	3117292070	40.84	40.75	145813175	135556091	65752081	39647604	1.45681e+08	1.35842e+08	8	9	19	23	5656	97	2894392084	10530	4	28	346	1	0 + 78 part	31915935	90.595	1.016
GDXY10	XY	maternal	TA	South Asian	0.179176	0.186508	0.070186	0.496605	0.067525	207	207	207	207	172	128	3044382234	3044382234	3044382234	3044382234	3043682422	3042125994	207	244103418	3044382234	3117292070	40.81	40.75	151208487	146619143	80062311	67184880	1.5289e+08	149313890	8	9	19	20	6394	85	3032025580	9843	0	35	258	3	0 + 67 part	29767874	94.863	1.017
GDXY11	XY	paternal	TA	European	0.397621	0.12956	0.023242	0.357453	0.092125	219	219	219	219	173	132	2933856777	2933856777	2933856777	2933856777	2932971585	2931548829	219	247042240	2933856777	3117292070	40.79	40.75	145718330	135849208	65509529	44853378	1.50833e+08	1.41957e+08	8	9	19	22	6130	108	2925313578	10263	3	51	278	3	1 + 82 part	30688121	91.133	1.019
GDXY11	XY	maternal	TA	European	0.397621	0.12956	0.023242	0.357453	0.092125	231	231	231	231	176	141	3041818931	3041818931	3041818931	3041818931	3040752627	3039564171	231	240308891	3041818931	3117292070	40.78	40.75	149490422	145816362	76999685	66184277	1.50573e+08	1.46927e+08	8	9	19	20	7972	108	3031594092	11605	4	32	416	2	0 + 86 part	32999247	94.531	1.019
GDXY2	XY	paternal	TA	African	0.264204	0.165245	0.0068	0.105413	0.458338	272	272	272	272	176	119	2895771773	2895771773	2895771773	2895771773	2893820477	2891929237	272	244299002	2895771773	3117292070	40.85	40.75	143962232	135375949	67015389	42336878	1.49529e+08	138902842	8	9	19	22	6744	95	2883040455	8387	2	21	298	0	1 + 80 part	25012301	90.217	1.017
GDXY2	XY	maternal	TA	African	0.264204	0.165245	0.0068	0.105413	0.458338	288	288	288	288	218	144	3097001181	3097001181	3097001181	3097001181	3095553362	3093001956	288	249512089	3097001181	3117292070	40.8	40.75	154885457	150775447	78929232	78929232	1.54096e+08	1.53093e+08	8	9	19	19	11238	102	3083982929	13546	1	27	578	0	1 + 78 part	42125550	94.779	1.031
GDXY3	XY	paternal	TA	African	0.300749	0.137448	1e-05	0.1782	0.383593	280	280	280	280	202	143	2935739083	2935739083	2935739083	2935739083	2934195036	2932068406	280	249399230	2935739083	3117292070	40.83	40.75	145254881	138922998	63751207	50531271	1.51568e+08	1.42741e+08	8	9	19	21	7205	121	2923490727	11986	1	37	286	0	0 + 93 part	29045539	90.99	1.022
GDXY3	XY	maternal	TA	African	0.300749	0.137448	1e-05	0.1782	0.383593	277	277	277	277	182	143	3048168438	3048168438	3048168438	3048168438	3046408707	3044999310	277	242368177	3048168438	3117292070	40.8	40.75	152227442	145229905	66929833	61315517	1.48736e+08	1.45438e+08	8	9	20	21	7483	127	3025205174	11991	1	31	418	0	0 + 101 part	29654718	94.772	1.019
GDXY5	XY	paternal	TA	European	0.996935	1e-05	0.003035	1e-05	1e-05	224	224	224	224	174	129	2922727916	2922727916	2922727916	2922727916	2921749056	2920127590	224	250835385	2922727916	3117292070	40.82	40.75	145885126	140622400	77993013	39267392	1.51898e+08	1.42418e+08	8	9	18	22	6771	102	2912759694	10925	3	42	384	1	0 + 76 part	29644212	90.863	1.019
GDXY5	XY	maternal	TA	European	0.996935	1e-05	0.003035	1e-05	1e-05	192	192	192	192	157	118	3046516719	3046516719	3046516719	3046516719	3045816944	3044407477	192	247148213	3046516719	3117292070	40.77	40.75	151513676	145796684	80894210	65710301	1.52534e+08	1.49071e+08	8	9	19	20	6021	74	3035461587	11550	3	37	292	0	1 + 64 part	31464371	94.981	1.016
GDXY6	XY	paternal	TA	European	0.630281	0.152452	1e-05	0.120634	0.096624	299	299	299	299	249	179	2939180102	2939180102	2939180102	2939180102	2938154121	2935695696	299	241856382	2939180102	3117292070	40.81	40.75	146062815	135119645	65364903	42637353	1.47298e+08	1.38882e+08	8	9	19	22	8594	144	2912141821	11668	2	42	458	4	0 + 132 part	30116283	90.919	1.023
GDXY6	XY	maternal	TA	European	0.630281	0.152452	1e-05	0.120634	0.096624	289	289	289	289	216	171	3052232789	3052232789	3052232789	3052232789	3050840213	3049309593	289	245332606	3052232789	3117292070	40.78	40.75	150217286	145279604	80528953	65586703	151194426	1.48039e+08	8	9	19	20	8087	130	3038565357	11118	8	42	472	3	0 + 120 part	30442642	94.628	1.022
GDXY7	XY	paternal	TA	South Asian	0.30841	0.160193	0.000656	0.485431	0.045311	207	207	207	207	156	110	2914710583	2914710583	2914710583	2914710583	2913688723	2912099197	207	245215671	2914710583	3117292070	40.86	40.75	145558086	137125829	79374214	51595513	1.51654e+08	1.41799e+08	8	9	18	21	6621	80	2905278482	9967	6	43	320	1	0 + 72 part	26560248	90.642	1.019
GDXY7	XY	maternal	TA	South Asian	0.30841	0.160193	0.000656	0.485431	0.045311	210	210	210	210	157	130	3037323353	3037323353	3037323353	3037323353	3036274366	3035335300	210	250853882	3037323353	3117292070	40.84	40.75	152439746	145921739	80077472	64158168	1.53208e+08	1.49278e+08	8	9	19	20	7838	82	3027335195	10377	3	40	366	1	0 + 63 part	33764565	94.481	1.017
GDXY8	XY	paternal	TA	South Asian	0.158019	0.071948	1e-05	0.770013	1e-05	216	216	216	216	176	122	2933023467	2933023467	2933023467	2933023467	2932204346	2930388823	216	246609157	2933023467	3117292070	40.83	40.75	145790181	142002744	81027029	50011178	151920663	1.4294e+08	8	9	18	21	6870	103	2925792190	11868	2	36	286	0	0 + 78 part	33460108	91.149	1.018
GDXY8	XY	maternal	TA	South Asian	0.158019	0.071948	1e-05	0.770013	1e-05	214	214	214	214	182	110	3045281905	3045281905	3045281905	3045281905	3044641045	3042110102	214	244078569	3045281905	3117292070	40.8	40.75	149461624	145856277	80131428	64859936	1.52036e+08	1.48524e+08	8	9	19	20	7577	93	3036006771	10570	2	39	302	1	0 + 75 part	33354505	94.642	1.018
GDXY9	XY	paternal	TA	South Asian	0.28753	0.272972	1e-05	0.319997	0.119491	324	324	324	324	246	168	2927558124	2927558124	2927558124	2927558124	2926140204	2923303843	324	243363864	2927558124	3117292070	40.8	40.75	145468193	135179908	66073509	40909223	1.51039e+08	1.41846e+08	8	9	19	22	8353	152	2917875054	10523	4	47	352	0	0 + 111 part	35192129	90.823	1.019
GDXY9	XY	maternal	TA	South Asian	0.28753	0.272972	1e-05	0.319997	0.119491	335	335	335	335	235	177	3021677736	3021677736	3021677736	3021677736	3019831147	3017578335	335	241659166	3021677736	3117292070	40.79	40.75	151708475	146240231	80518800	64803798	1.51536e+08	1.46888e+08	8	9	19	20	6338	161	3010485190	9708	4	54	296	1	1 + 125 part	24264814	94.463	1.015
[truncated: 42 more columns]

[truncated: 14 more sheets: Supplementary_10, Supplementary_11, Supplementary_12, Supplementary 13, Supplementary_14, Supplementary_15, Supplementary_16, Supplementary_17, Supplementary_18, Supplementary_19, Supplementary_20, Supplementary_21, Supplementary_22, Supplementary_23]
